# Supplementary material for: Resistance of Neisseria gonorrhoeae isolates to beta-lactam antibiotics (benzylpenicillin and ceftriaxone) in Russia, 2015–2017
Source: PLoS One. 2019 Jul 25;14(7):e0220339. doi: 10.1371/journal.pone.0220339 (PMC6657886; doi:10.1371/journal.pone.0220339)
Supplement: S1 Table — ST–NG-MAST sequence type, Pen–penicillin, Tet–tetracycline, Cef–ceftriaxone, Cip–ciprofloxacin, Spec–spectinomycin, Azit–azithromycin. (XLSX) [file pone.0220339.s001.xlsx]

## Sheet: Лист1
	S1 Table. Characteristics of N. gonorrhoeae clinical isolates used in this study, including the results of drug susceptibility testing, profiles of genetic determinants of drug resistance and NG-MAST sequence types
№№	Sample	Region	NG-MAST			MIC, mg/L						Mutations detected by microarray
	code		porB	tpb	ST	Pen	Tet	Cef	Cip	Spec	Azit	gyrA	parC	rpsJ	penA	ponA	16S		23S	mtrR	porB	tetM	blaTEM
																	16S 1192	16S 1064		-35
1	07/17/07	Arkhangelsk	37	27	807	0.12	0.25	0.002	0.002	16	0.03	Thr91, Gly95	wt (Ser87, Glu91)	wt (Val57)	ins345Asp	wt (Leu421)	wt	wt	wt	wt	wt (Gly120, Ala121)	–	–
2	07/17/10	Arkhangelsk	37	27	807	0.12	0.12	0.002	0.002	32	0.015	Thr91, Gly95	wt (Ser87, Glu91)	wt (Val57)	ins345Asp	wt (Leu421)	wt	wt	wt	wt	wt (Gly120, Ala121)	–	–
3	07/17/24	Arkhangelsk	1489	563	2400	1	2	0.032	32	32	0.25	Phe91, Asn95	Ser87, Gly91	Met57	ins345Asp	wt (Leu421)	wt	wt	wt	-35delA	Asn120, Asp 121	–	–
4	07/17/34	Arkhangelsk	8662	33	14944	0.25	2	0.008	0.004	32	0.5	Thr91, Gly95	wt (Ser87, Glu91)	Met57	ins345Asp	wt (Leu421)	wt	wt	wt	-35delA	Asn120, Asp121	–	–
5	07/17/35	Arkhangelsk	3547	27	5941	0.12	0.12	0.002	0.002	16	0.06	Thr91, Gly95	wt (Ser87, Glu91)	wt (Val57)	ins345Asp	wt (Leu421)	wt	wt	wt	wt	wt (Gly120, Ala121)	–	–
6	07/17/38	Arkhangelsk	1388	110	2212	0.25	2	0.032	64	16	0.5	Phe91, Asn95	Arg 87, Glu91	Met57	ins345Asp	Pro421	wt	wt	wt	-35delA	Lys120, Asn121	–	–
7	07/17/39	Arkhangelsk	1433	110	15616	0.12	1	0.032	0.03	16	0.5	Thr91, Gly95	wt (Ser87, Glu91)	Met57	ins345Asp	Pro421	wt	wt	wt	-35delA	Asn120, Asp121	–	–
8	07/17/30	Arkhangelsk	37	27	807	0.12	0.12	0.002	0.002	16	0.03	Thr91, Gly95	wt (Ser87, Glu91)	wt (Val57)	wt	wt (Leu421)	wt	wt	wt	wt	wt (Gly120, Ala121)	–	–
9	07/17/43	Arkhangelsk	8664	4	14934	0.25	0.5	0.002	8	32	0.06	Phe91, Asn 95	Arg 87, Glu91	Met57	ins345Asp	Pro421	wt	wt	wt	wt	Asp120, Ala121	–	–
10	07/17/44	Arkhangelsk	8667	27	14935	0.12	0.12	0.002	0.004	32	0.06	Thr91, Gly95	wt (Ser87, Glu91)	wt (Val57)	wt	wt (Leu421)	wt	wt	wt	wt	wt (Gly120, Ala121)	–	–
11	07/17/04	Arkhangelsk	8094	4	14019	0.015	0.5	0.002	4	16	0.06	Phe91, Asn 95	Arg 87, Glu91	Met57	ins345Asp	Pro421	wt	wt	wt	wt	wt (Gly120, Ala121)	–	–
12	07/17/14	Arkhangelsk	37	27	807	0.12	0.5	0.002	0.004	32	0.03	Thr91, Gly95	wt (Ser87, Glu91)	wt (Val57)	ins345Asp	wt (Leu421)	wt	wt	wt	wt	wt (Gly120, Ala121)	–	–
13	07/17/13	Arkhangelsk	8660	1052	14939	0.12	0.25	0.002	0.008	32	0.12	Thr91, Gly95	wt (Ser87, Glu91)	wt (Val57)	wt	wt (Leu421)	wt	wt	wt	wt	wt (Gly120, Ala121)	–	–
14	07/17/52	Arkhangelsk	8094	4	14019	0.25	1	0.004	4	32	0.06	Phe91, Asn 95	Arg 87, Glu91	Met57	ins345Asp	Pro421	wt	wt	wt	wt	wt (Gly120, Ala121)	–	–
15	07/17/32	Arkhangelsk	8094	4	14019	0.25	0.5	0.002	4	32	0.06	Phe91, Asn 95	Arg 87, Glu91	wt (Val57)	wt	Pro421	wt	wt	wt	wt	wt (Gly120, Ala121)	–	–
16	07/17/25	Arkhangelsk	37	27	807	0.12	0.25	0.002	0.004	32	0.06	Thr91, Gly95	wt (Ser87, Glu91)	wt (Val57)	ins345Asp	wt (Leu421)	wt	wt	wt	wt	wt (Gly120, Ala121)	–	–
17	07/17/54	Arkhangelsk	3450	4	14942	0.25	1	0.002	8	32	0.06	Phe91, Asn 95	Arg 87, Glu91	Met57	ins345Asp	Pro421	wt	wt	wt	wt	wt (Gly120, Ala121)	–	–
18	07/17/15	Arkhangelsk	3450	4	14942	0.25	1	0.004	16	32	0.06	Phe91, Asn 95	Arg 87, Glu91	Met57	ins345Asp	Pro421	wt	wt	wt	wt	wt (Gly120, Ala121)	–	–
19	07/17/02	Arkhangelsk	5619	4	9476	0.25	0.5	0.002	8	16	0.12	Phe91, Gly95	Arg 87, Glu91	Met57	ins345Asp	Pro421	wt	wt	wt	wt	Asp120, Ala121	–	–
20	07/17/47	Arkhangelsk	975	27	1544	0.25	0.12	0.002	0.004	16	0.12	Thr91, Gly95	wt (Ser87, Glu91)	wt (Val57)	ins345Asp	wt (Leu421)	wt	wt	wt	wt	wt (Gly120, Ala121)	–	–
21	07/17/18	Arkhangelsk	1433	33	15618	0.06	2	0.008	0.03	16	0.5	Thr91, Gly95	wt (Ser87, Glu91)	wt (Val57)	wt	wt (Leu421)	wt	wt	wt	wt	Asn120, Asp121	–	–
22	07/17/19	Arkhangelsk	3450	4	14942	0.015	0.5	0.002	8	32	0.06	Thr91, Gly95	wt (Ser87, Glu91)	wt (Val57)	ins345Asp	wt (Leu421)	wt	wt	wt	wt	wt (Gly120, Ala121)	–	–
23	07/17/53	Arkhangelsk	8094	4	14019	0.25	0.5	0.004	8	16	0.06	Phe91, Asn 95	Arg 87, Glu91	Met57	ins345Asp	Pro421	wt	wt	wt	wt	wt (Gly120, Ala121)	–	–
24	07/16/20	Arkhangelsk	37	27	807	0.25	1	0.008	0.004	8	0.06	wt (Ser 91, Asp95)	wt (Ser87, Glu91)	wt (Val57)	ins345Asp	wt (Leu421)	wt	wt	wt	wt	wt (Gly120, Ala121)	–	–
25	07/16/15	Arkhangelsk	7325	25	12531	0.06	0.25	0.002	0.004	16	0.06	wt (Ser 91, Asp95)	wt (Ser87, Glu91)	wt (Val57)	ins345Asp	wt (Leu421)	wt	wt	wt	wt	wt (Gly120, Ala121)	–	–
26	07/16/05	Arkhangelsk	5619	4	9476	0.03	0.12	0.002	0.008	16	0.06	Phe91, Gly95	Arg 87, Glu91	Met57	ins345Asp	Pro421	wt	wt	wt	wt	Asp120, Ala121	–	–
27	07/16/36	Arkhangelsk	7074	27	14604	16	32	0.002	4	16	0.06	wt (Ser 91, Asp95)	wt (Ser87, Glu91)	wt (Val57)	ins345Asp	wt (Leu421)	wt	wt	wt	wt	wt (Gly120, Ala121)	tetM	blaTEM (African)
28	07/16/33	Arkhangelsk	975	27	1544	0.06	0.25	0.002	0.004	16	0.12	wt (Ser 91, Asp95)	wt (Ser87, Glu91)	wt (Val57)	ins345Asp	wt (Leu421)	wt	wt	wt	-35delA	wt (Gly120, Ala121)	–	–
29	07/16/16	Arkhangelsk	2009	812	12524	0.25	1	0.004	8	16	0.25	Phe91, Gly95	Arg87, Glu91	Met57	ins345Asp	wt (Leu421)	wt	wt	wt	wt	wt (Gly120, Ala121)	–	–
30	07/16/04	Arkhangelsk	7325	25	12531	0.03	0.25	0.008	0.008	32	0.06	wt (Ser 91, Asp95)	wt (Ser87, Glu91)	wt (Val57)	ins345Asp	wt (Leu421)	wt	wt	wt	wt	wt (Gly120, Ala121)	–	–
31	07/16/14	Arkhangelsk	975	27	1544	0.06	0.12	0.002	0.004	16	0.12	wt (Ser 91, Asp95)	wt (Ser87, Glu91)	wt (Val57)	ins345Asp	wt (Leu421)	wt	wt	wt	wt	wt (Gly120, Ala121)	–	–
32	07/16/41	Arkhangelsk	37	27	807	0.015	0.06	0.002	0.002	8	0.06	wt (Ser 91, Asp95)	wt (Ser87, Glu91)	wt (Val57)	ins345Asp	wt (Leu421)	wt	wt	wt	wt	wt (Gly120, Ala121)	–	–
33	07/16/21	Arkhangelsk	5619	27	14007	0.12	0.5	0.002	4	16	0.12	Phe91, Asn95	Arg87, Glu91	Met57	ins345Asp	Pro421	wt	wt	wt	wt	Asp120, Ala121	–	–
34	07/16/35	Arkhangelsk	7330	25	12540	0.5	4	0.004	0.015	16	0.25	wt (Ser 91, Asp95)	wt (Ser87, Glu91)	Met57	ins345Asp	wt (Leu421)	wt	wt	wt	wt	Lys120, Asn121	–	–
35	07/16/11	Arkhangelsk	37	27	807	0.06	0.5	0.008	0.004	16	0.03	wt (Ser 91, Asp95)	wt (Ser87, Glu91)	wt (Val57)	ins345Asp	wt (Leu421)	wt	wt	wt	wt	wt (Gly120, Ala121)	–	–
36	07/16/37	Arkhangelsk	383	321	1241	0.12	0.06	0.002	0.002	16	0.12	wt (Ser 91, Asp95)	wt (Ser87, Glu91)	wt (Val57)	wt	wt (Leu421)	wt	wt	wt	wt	wt (Gly120, Ala121)	–	–
37	07/16/03	Arkhangelsk	948	2390	14017	0.015	0.5	0.002	0.008	32	0.12	wt (Ser 91, Asp95)	wt (Ser87, Glu91)	Met57	ins345Asp	wt (Leu421)	wt	wt	wt	wt	wt (Gly120, Ala121)	–	–
38	07/16/31	Arkhangelsk	5619	4	9476	0.12	0.5	0.002	16	16	0.06	Phe91, Gly95	Arg87, Glu91	Met57	ins345Asp	wt (Leu421)	wt	wt	wt	wt	Asp120, Ala121	–	–
39	07/16/34	Arkhangelsk	7330	25	12540	0.5	4	0.004	0.015	16	0.5	wt (Ser 91, Asp95)	wt (Ser87, Glu91)	Met57	ins345Asp	wt (Leu421)	wt	wt	wt	wt	Lys120, Asn121	–	–
40	07/16/12	Arkhangelsk	7786	25	13460	0.12	0.25	0.002	0.004	16	0.03	wt (Ser 91, Asp95)	wt (Ser87, Glu91)	wt (Val57)	ins345Asp	wt (Leu421)	wt	wt	wt	wt	wt (Gly120, Ala121)	–	–
41	07/16/02	Arkhangelsk	7074	4	12096	16	32	0.002	8	16	0.06	Phe91, Asp95	Arg87, Lys91	Met57	ins345Asp	wt (Leu421)	wt	wt	wt	wt	wt (Gly120, Ala121)	tetM	blaTEM (African)
42	07/16/40	Arkhangelsk	421	2390	14020	0.12	1	0.004	8	16	0.5	wt (Ser 91, Asp95)	wt (Ser87, Glu91)	Met57	ins345Asp	wt (Leu421)	wt	wt	wt	wt	wt (Gly120, Ala121)	–	–
43	07/16/08	Arkhangelsk	421	2390	14020	0.03	0.5	0.002	0.004	16	0.06	wt (Ser 91, Asp95)	wt (Ser87, Glu91)	Met57	ins345Asp	wt (Leu421)	wt	wt	wt	wt	wt (Gly120, Ala121)	–	–
44	07/16/19	Arkhangelsk	975	27	1544	0.06	0.12	0.002	0.004	16	0.06	wt (Ser 91, Asp95)	wt (Ser87, Glu91)	wt (Val57)	ins345Asp	wt (Leu421)	wt	wt	wt	wt	wt (Gly120, Ala121)	–	–
45	07/16/01	Arkhangelsk	7074	4	12096	16	32	0.002	8	32	0.12	Phe91, Asp95	Arg87, Lys91	Met57	ins345Asp	Pro421	wt	wt	wt	wt	wt (Gly120, Ala121)	tetM	blaTEM (African)
46	07/16/39	Arkhangelsk	37	27	807	0.06	0.25	0.002	0.004	32	0.03	wt (Ser 91, Asp95)	wt (Ser87, Glu91)	wt (Val57)	ins345Asp	wt (Leu421)	wt	wt	wt	wt	wt (Gly120, Ala121)	–	–
47	07/16/25	Arkhangelsk	1672	2447	14605	0.015	32	0.002	0.004	16	0.06	wt (Ser 91, Asp95)	wt (Ser87, Glu91)	wt (Val57)	wt	wt (Leu421)	wt	wt	wt	wt	wt (Gly120, Ala121)	tetM	–
48	07/16/29	Arkhangelsk	37	27	807	0.015	0.25	0.002	0.004	16	0.06	wt (Ser 91, Asp95)	wt (Ser87, Glu91)	wt (Val57)	ins345Asp	wt (Leu421)	wt	wt	wt	-35delA	wt (Gly120, Ala121)	–	–
49	07/16/28	Arkhangelsk	7324	27	12530	0.03	0.25	0.002	0.004	16	0.12	wt (Ser 91, Asp95)	wt (Ser87, Glu91)	wt (Val57)	ins345Asp	wt (Leu421)	wt	wt	wt	-35delA	wt (Gly120, Ala121)	–	–
50	07/16/45	Arkhangelsk	7324	27	12530	0.015	0.25	0.002	0.003	16	0.06	wt (Ser 91, Asp95)	wt (Ser87, Glu91)	wt (Val57)	ins345Asp	wt (Leu421)	wt	wt	wt	wt	wt (Gly120, Ala121)	–	–
51	07/16/62	Arkhangelsk	5619	4	9476	0.25	1	0.008	8	32	0.06	Phe91, Gly95	Arg87, Glu91	Met57	ins345Asp	Pro421	wt	wt	wt	wt	Asp120, Ala121	–	–
52	07/16/58	Arkhangelsk	522	118	13459	0.03	0.25	0.002	0.004	32	0.06	wt (Ser 91, Asp95)	wt (Ser87, Glu91)	wt (Val57)	wt	wt (Leu421)	wt	wt	wt	wt	wt (Gly120, Ala121)	–	–
53	07/16/27	Arkhangelsk	7325	25	12531	0.03	0.25	0.002	0.004	16	0.06	wt (Ser 91, Asp95)	wt (Ser87, Glu91)	wt (Val57)	ins345Asp	wt (Leu421)	wt	wt	wt	wt	wt (Gly120, Ala121)	–	–
54	07/16/46	Arkhangelsk	522	118	13459	0.03	0.25	0.004	0.002	16	0.12	wt (Ser91, Asp95)	wt (Ser87, Glu91)	wt (Val57)	wt	wt (Leu421)	wt	wt	wt	-35delA	wt (Gly120, Ala121)	–	–
55	07/16/38	Arkhangelsk	522	118	13459	0.015	0.25	0.002	0.002	16	0.06	wt (Ser91, Asp95)	wt (Ser87, Glu91)	wt (Val57)	wt	wt (Leu421)	wt	wt	wt	wt	wt (Gly120, Ala121)	–	–
56	07/16/13	Arkhangelsk	8095	1052	14021	0.015	0.25	0.002	0.004	32	0.12	wt (Ser91, Asp95)	wt (Ser87, Glu91)	wt (Val57)	wt	wt (Leu421)	wt	wt	wt	wt	wt (Gly120, Ala121)	–	–
57	07/16/30	Arkhangelsk	1642	1052	5042	0.06	0.25	0.002	0.004	16	0.06	wt (Ser91, Asp95)	wt (Ser87, Glu91)	wt (Val57)	wt	wt (Leu421)	wt	wt	wt	wt	wt (Gly120, Ala121)	–	–
58	07/16/32	Arkhangelsk	37	27	807	0.06	0.25	0.004	0.004	32	0.06	wt (Ser91, Asp95)	wt (Ser87, Glu91)	wt (Val57)	ins345Asp	wt (Leu421)	wt	wt	wt	wt	wt (Gly120, Ala121)	–	–
59	07/16/24	Arkhangelsk	1602	4	2616	0.5	2	0.008	8	16	0.5	Phe91, Gly95	Arg87, Glu91	Met57	ins345Asp	wt (Leu421)	wt	wt	wt	wt	Asn120, Asp121	–	–
60	07/16/23	Arkhangelsk	1602	4	2616	0.25	2	0.004	8	16	0.25	Phe91, Gly95	Arg87, Glu91	Met57	ins345Asp	wt (Leu421)	wt	wt	wt	wt	Asn120, Asp121	–	–
61	07/16/17	Arkhangelsk	37	118	9569	0.015	0.25	0.002	0.004	32	0.12	wt (Ser91, Asp95)	wt (Ser87, Glu91)	wt (Val57)	ins345Asp	wt (Leu421)	wt	wt	wt	-35delA	wt (Gly120, Ala121)	–	–
62	07/16/22	Arkhangelsk	975	27	1544	0.015	0.5	0.002	0.002	16	0.12	wt (Ser91, Asp95)	Ser87, Gly 91	wt (Val57)	wt	wt (Leu421)	wt	wt	wt	wt	wt (Gly120, Ala121)	–	–
63	07/16/18	Arkhangelsk	7329	74	12539	0.25	0.5	0.002	0.004	16	0.12	wt (Ser91, Asp95)	wt (Ser87, Glu91)	Met57	ins345Asp	wt (Leu421)	wt	wt	wt	-35delA	wt (Gly120, Ala121)	–	–
64	07/16/61	Arkhangelsk	23	1124	14008	0.015	0.12	0.002	0.004	8	0.015	wt (Ser91, Asp95)	wt (Ser87, Glu91)	wt (Val57)	ins345Asp	wt (Leu421)	wt	wt	wt	wt	wt (Gly120, Ala121)	–	–
65	07/16/10	Arkhangelsk	7783	812	13454	0.25	0.5	0.008	8	16	0.25	Phe91, Gly95	Arg87, Glu91	Met57	ins345Asp	Pro421	wt	wt	wt	-35delA	wt (Gly120, Ala121)	–	–
66	07/16/44	Arkhangelsk	3450	27	14009	0.03	0.06	0.002	4	8	0.12	wt (Ser91, Asp95)	wt (Ser87, Glu91)	wt (Val57)	wt	wt (Leu421)	wt	wt	wt	wt	wt (Gly120, Ala121)	–	–
67	07/16/56	Arkhangelsk	948	2390	14017	0.03	0.25	0.002	0.004	8	0.03	Phe91, Gly95	Arg87, Glu91	Met57	ins345Asp	Pro421	wt	wt	wt	wt	wt (Gly120, Ala121)	–	–
68	07/16/57	Arkhangelsk	383	1714	9486	0.03	0.25	0.002	0.004	32	0.03	wt (Ser91, Asp95)	wt (Ser87, Glu91)	wt (Val57)	wt	wt (Leu421)	wt	wt	wt	wt	wt (Gly120, Ala121)	–	–
69	07/16/09	Arkhangelsk	8094	4	14019	0.12	0.5	0.002	4	16	0.06	wt (Ser91, Asp95)	wt (Ser87, Glu91)	Met57	ins345Asp	wt (Leu421)	wt	wt	wt	wt	wt (Gly120, Ala121)	–	–
70	07/16/59	Arkhangelsk	421	2390	14020	0.03	0.5	0.002	0.004	16	0.03	wt (Ser91, Asp95)	wt (Ser87, Glu91)	Met57	ins345Asp	wt (Leu421)	wt	wt	wt	wt	wt (Gly120, Ala121)	–	–
71	07/16/26	Arkhangelsk	975	2446	14606	0.25	4	0.004	0.015	16	0.5	wt (Ser91, Asp95)	wt (Ser87, Glu91)	wt (Val57)	wt	wt (Leu421)	wt	wt	wt	wt	wt (Gly120, Ala121)	–	–
72	07/16/52	Arkhangelsk	7783	812	13454	0.03	0.25	0.002	0.004	16	0.06	Phe91, Gly95	Arg87, Glu91	Met57	ins345Asp	wt (Leu421)	wt	wt	wt	-35delA	wt (Gly120, Ala121)	–	–
73	07/16/47	Arkhangelsk	549	2302	13455	0.12	1	0.002	8	16	0.12	wt (Ser91, Asp95)	wt (Ser87, Glu91)	wt (Val57)	wt	wt (Leu421)	wt	wt	wt	wt	wt (Gly120, Ala121)	–	–
74	07/16/07	Arkhangelsk	14	33	21	1	2	0.015	0.015	16	0.25	wt (Ser91, Asp95)	wt (Ser87, Glu91)	Met57	ins345Asp	Pro421	wt	wt	wt	wt	Asn120, Asp121	–	–
75	07/16/54	Arkhangelsk	7325	25	12531	0.03	0.25	0.002	0.004	16	0.06	wt (Ser91, Asp95)	wt (Ser87, Glu91)	wt (Val57)	ins345Asp	wt (Leu421)	wt	wt	wt	wt	wt (Gly120, Ala121)	–	–
76	07/16/53	Arkhangelsk	7783	812	13454	0.03	0.25	0.002	0.004	16	0.06	Phe91, Gly95	Arg87, Glu91	Met57	ins345Asp	Pro421	wt	wt	wt	-35delA	wt (Gly120, Ala121)	–	–
77	07/16/48	Arkhangelsk	383	1714	9486	0.12	1	0.004	8	16	0.12	wt (Ser91, Asp95)	wt (Ser87, Glu91)	wt (Val57)	wt	wt (Leu421)	wt	wt	wt	wt	wt (Gly120, Ala121)	–	–
78	07/16/42	Arkhangelsk	383	1714	9486	1	4	0.125	0.06	16	0.5	wt (Ser91, Asp95)	wt (Ser87, Glu91)	wt (Val57)	ins345Asp	wt (Leu421)	wt	wt	wt	wt	wt (Gly120, Ala121)	–	–
79	07/16/50	Arkhangelsk	975	27	1544	0.03	0.5	0.002	0.004	16	0.06	wt (Ser91, Asp95)	wt (Ser87, Glu91)	wt (Val57)	ins345Asp	wt (Leu421)	wt	wt	wt	wt	wt (Gly120, Ala121)	–	–
80	07/16/43	Arkhangelsk	975	27	1544	0.06	0.25	0.004	0.004	32	0.06	wt (Ser91, Asp95)	wt (Ser87, Glu91)	wt (Val57)	ins345Asp	wt (Leu421)	wt	wt	wt	wt	wt (Gly120, Ala121)	–	–
81	07/16/49	Arkhangelsk	975	2303	13456	0.03	1	0.004	0.008	16	0.06	wt (Ser91, Asp95)	wt (Ser87, Glu91)	wt (Val57)	ins345Asp	wt (Leu421)	wt	wt	wt	wt	wt (Gly120, Ala121)	–	–
82	07/16/55	Arkhangelsk	7325	25	12531	0.03	0.25	0.002	0.004	32	0.06	wt (Ser91, Asp95)	wt (Ser87, Glu91)	wt (Val57)	wt	wt (Leu421)	wt	wt	wt	wt	wt (Gly120, Ala121)	–	–
83	07/16/51	Arkhangelsk	1489	563	2400	0.015	0.25	0.002	0.004	16	0.06	Phe91, Gly95	Ser87, Gly 91	Met57	ins345Asp	wt (Leu421)	wt	wt	wt	-35delA	Asn120, Asp121	–	–
84	07/16/06	Arkhangelsk	7785	2304	13458	0.12	0.5	0.002	0.008	32	0.25	Thr 91, Asp95	wt (Ser87, Glu91)	wt (Val57)	ins345Asp	wt (Leu421)	wt	wt	wt	wt	Gly120, Asp121	–	–
85	07/16/60	Arkhangelsk	8093	6	14018	0.015	0.25	0.002	0.004	32	0.12	wt (Ser91, Asp95)	wt (Ser87, Glu91)	wt (Val57)	wt	wt (Leu421)	wt	wt	wt	wt	wt (Gly120, Ala121)	–	–
86	07/16/63	Arkhangelsk	8093	6	14018	0.015	0.25	0.002	0.004	32	0.12	wt (Ser91, Asp95)	wt (Ser87, Glu91)	wt (Val57)	wt	wt (Leu421)	wt	wt	wt	wt	wt (Gly120, Ala121)	–	–
87	07/15/01	Arkhangelsk	975	27	1544	0.5	0.5	0.004	0.004	32	0.015	wt (Ser91, Asp95)	Arg87, Glu91	wt (Val57)	ins345Asp	wt (Leu421)	wt	wt	wt	wt	wt (Gly120, Ala121)	–	–
88	07/15/02	Arkhangelsk	7325	25	12531	0.12	0.12	0.002	0.015	32	0.015	wt (Ser91, Asp95)	wt (Ser87, Glu91)	wt (Val57)	ins345Asp	wt (Leu421)	wt	wt	wt	wt	wt (Gly120, Ala121)	–	–
89	07/15/03	Arkhangelsk	37	27	807	0.12	0.5	0.008	0.002	32	0.015	wt (Ser91, Asp95)	wt (Ser87, Glu91)	wt (Val57)	ins345Asp	wt (Leu421)	wt	wt	wt	wt	wt (Gly120, Ala121)	–	–
90	07/15/04	Arkhangelsk	37	1124	12529	0.25	0.06	0.004	0.004	32	0.008	wt (Ser91, Asp95)	wt (Ser87, Glu91)	wt (Val57)	ins345Asp	wt (Leu421)	wt	wt	wt	wt	wt (Gly120, Ala121)	–	–
91	07/15/05	Arkhangelsk	948	291	1580	0.015	0.5	0.002	0.004	32	0.008	wt (Ser91, Asp95)	wt (Ser87, Glu91)	wt (Val57)	wt	wt (Leu421)	wt	wt	wt	wt	wt (Gly120, Ala121)	–	–
92	07/15/06	Arkhangelsk	2037	118	12444	0.015	0.25	0.002	0.002	32	0.015	wt (Ser91, Asp95)	wt (Ser87, Glu91)	wt (Val57)	wt	wt (Leu421)	wt	wt	wt	wt	wt (Gly120, Ala121)	–	–
93	07/15/07	Arkhangelsk	7287	2096	12447	0.25	0.5	0.004	16	32	0.015	Phe91, Gly95	Arg87, Glu91	Met57	ins345Asp	Pro421	wt	wt	wt	wt	wt (Gly120, Ala121)	–	–
94	07/15/08	Arkhangelsk	1642	1052	5042	0.03	0.5	0.002	0.008	32	0.015	wt (Ser91, Asp95)	wt (Ser87, Glu91)	wt (Val57)	wt	wt (Leu421)	wt	wt	wt	wt	wt (Gly120, Ala121)	–	–
95	07/15/09	Arkhangelsk	7329	74	12539	0.06	0.5	0.002	0.004	32	0.015	wt (Ser91, Asp95)	wt (Ser87, Glu91)	Met57	ins345Asp	Pro421	wt	wt	wt	wt	wt (Gly120, Ala121)	–	–
96	07/15/10	Arkhangelsk	7325	25	12531	0.015	0.25	0.002	0.03	32	0.06	wt (Ser91, Asp95)	wt (Ser87, Glu91)	wt (Val57)	ins345Asp	wt (Leu421)	wt	wt	wt	wt	wt (Gly120, Ala121)	–	–
97	07/15/11	Arkhangelsk	2009	812	12524	0.25	4	0.008	16	32	0.03	Phe91, Gly95	Arg87, Glu91	Met57	ins345Asp	Pro421	wt	wt	wt	-35delA	wt (Gly120, Ala121)	–	–
98	07/15/12	Arkhangelsk	5619	4	9476	0.25	0.5	0.008	4	32	0.015	Phe91, Gly95	Arg87, Gly91	Met57	ins345Asp	Pro421	wt	wt	wt	wt	Asp120, Ala121	–	–
99	07/15/13	Arkhangelsk	5619	4	9476	0.25	0.5	0.004	8	32	0.015	Phe91, Gly95	Arg87, Glu91	Met57	ins345Asp	Pro421	wt	wt	wt	wt	Asp120, Ala121	–	–
100	07/15/14	Arkhangelsk	5619	4	9476	0.25	0.5	0.002	8	32	0.015	Phe91, Gly95	Arg87, Glu91	Met57	ins345Asp	Pro421	wt	wt	wt	wt	Asp120, Ala121	–	–
101	07/15/15	Arkhangelsk	5619	4	9476	0.25	0.25	0.004	8	32	0.015	Phe91, Gly95	Arg87, Glu91	wt (Val57)	ins345Asp	Pro421	wt	wt	wt	wt	Asp120, Ala121	–	–
102	07/15/16	Arkhangelsk	5619	4	9476	1	0.5	0.004	8	32	0.015	Phe91, Gly95	Arg87, Glu91	Met57	ins345Asp	Pro421	wt	wt	wt	wt	Asp120, Ala121	–	–
103	07/15/17	Arkhangelsk	975	27	1544	0.06	0.25	0.002	0.004	32	0.03	wt (Ser91, Asp95)	wt (Ser87, Glu91)	wt (Val57)	ins345Asp	wt (Leu421)	wt	wt	wt	wt	wt (Gly120, Ala121)	–	–
104	07/15/18	Arkhangelsk	37	1124	12529	0.06	0.25	0.002	0.004	32	0.008	wt (Ser91, Asp95)	wt (Ser87, Glu91)	wt (Val57)	ins345Asp	wt (Leu421)	wt	wt	wt	wt	wt (Gly120, Ala121)	–	–
105	07/15/19	Arkhangelsk	5619	4	9476	0.25	0.5	0.004	8	32	0.015	Phe91, Gly95	Arg87, Glu91	Met57	ins345Asp	Pro421	wt	wt	wt	wt	Asp120, Ala121	–	–
106	07/15/20	Arkhangelsk	2020	4	3329	0.25	0.5	0.002	16	32	0.015	Phe91, Gly95	Arg87, Glu91	Met57	ins345Asp	Pro421	wt	wt	wt	-35delA	Lys 120, Gly121	–	–
107	07/15/21	Arkhangelsk	7336	27	12557	0.03	0.25	0.004	0.008	32	0.008	wt (Ser91, Asp95)	wt (Ser87, Glu91)	wt (Val57)	ins345Asp	wt (Leu421)	wt	wt	wt	wt	wt (Gly120, Ala121)	–	–
108	07/15/22	Arkhangelsk	5678	6	9660	0.015	0.5	0.002	0.004	32	0.015	wt (Ser91, Asp95)	wt (Ser87, Glu91)	wt (Val57)	wt	wt (Leu421)	wt	wt	wt	wt	wt (Gly120, Ala121)	–	–
109	07/15/23	Arkhangelsk	7324	27	12530	0.12	0.06	0.008	0.004	32	0.015	wt (Ser91, Asp95)	wt (Ser87, Glu91)	wt (Val57)	ins345Asp	wt (Leu421)	wt	wt	wt	wt	wt (Gly120, Ala121)	–	–
110	07/15/24	Arkhangelsk	975	27	1544	0.12	0.25	0.004	0.002	32	0.015	wt (Ser91, Asp95)	wt (Ser87, Glu91)	wt (Val57)	ins345Asp	wt (Leu421)	wt	wt	wt	wt	wt (Gly120, Ala121)	–	–
111	07/15/25	Arkhangelsk	1642	1052	5042	0.015	0.25	0.002	0.008	32	0.015	wt (Ser91, Asp95)	wt (Ser87, Glu91)	wt (Val57)	wt	wt (Leu421)	wt	wt	wt	wt	wt (Gly120, Ala121)	–	–
112	07/15/26	Arkhangelsk	37	27	807	0.06	0.06	0.015	0.004	32	0.008	wt (Ser91, Asp95)	wt (Ser87, Glu91)	wt (Val57)	ins345Asp	wt (Leu421)	wt	wt	wt	wt	wt (Gly120, Ala121)	–	–
113	07/15/27	Arkhangelsk	7287	2096	12447	0.25	0.5	0.002	16	32	0.015	Phe91, Gly95	Arg87, Glu91	Met57	ins345Asp	wt (Leu421)	wt	wt	wt	wt	wt (Gly120, Ala121)	–	–
114	07/15/28	Arkhangelsk	7325	25	12531	0.06	0.25	0.002	0.008	32	0.03	wt (Ser91, Asp95)	wt (Ser87, Glu91)	wt (Val57)	ins345Asp	wt (Leu421)	wt	wt	wt	wt	wt (Gly120, Ala121)	–	–
115	07/15/29	Arkhangelsk	5619	4	9476	0.25	0.5	0.015	8	32	0.015	Phe91, Gly95	Arg87, Glu91	Met57	ins345Asp	Pro421	wt	wt	wt	wt	Asp120, Ala121	–	–
116	07/15/30	Arkhangelsk	5619	4	9476	0.25	1	0.004	16	32	0.015	Phe91, Gly95	Arg87, Glu91	Met57	ins345Asp	wt (Leu421)	wt	wt	wt	wt	Asp120, Ala121	–	–
117	07/15/31	Arkhangelsk	7337	4	12558	0.25	0.25	0.015	4	32	0.004	Phe91, Asn95	wt (Ser87, Glu91)	Met57	ins345Asp	Pro421	wt	wt	wt	wt	wt (Gly120, Ala121)	–	–
118	07/15/32	Arkhangelsk	7325	25	12531	0.12	0.06	0.001	0.03	32	0.015	wt (Ser91, Asp95)	wt (Ser87, Glu91)	wt (Val57)	ins345Asp	wt (Leu421)	wt	wt	wt	wt	wt (Gly120, Ala121)	–	–
119	07/15/33	Arkhangelsk	685	25	1043	0.5	2	0.015	0.06	32	0.03	wt (Ser91, Asp95)	wt (Ser87, Glu91)	Met57	ins345Asp	wt (Leu421)	wt	wt	wt	-35delA	Lys 120, Asp121	–	–
120	07/15/34	Arkhangelsk	5637	4	9499	0.25	0.5	0.004	8	32	0.015	Phe91, Gly95	Arg87, Glu91	Met57	ins345Asp	Pro421	wt	wt	wt	wt	wt (Gly120, Ala121)	–	–
121	07/15/35	Arkhangelsk	5619	4	9476	0.25	0.5	0.015	4	32	0.015	Phe91, Gly95	Arg87, Glu91	Met57	ins345Asp	Pro421	wt	wt	wt	wt	Asp120, Ala121	–	–
122	07/15/36	Arkhangelsk	37	27	807	0.06	0.25	0.004	0.008	32	0.004	wt (Ser91, Asp95)	wt (Ser87, Glu91)	wt (Val57)	ins345Asp	wt (Leu421)	wt	wt	wt	wt	wt (Gly120, Ala121)	–	–
123	07/15/37	Arkhangelsk	7325	25	12531	0.06	0.5	0.004	0.004	32	0.015	wt (Ser91, Asp95)	wt (Ser87, Glu91)	wt (Val57)	ins345Asp	wt (Leu421)	wt	wt	wt	wt	wt (Gly120, Ala121)	–	–
124	07/15/38	Arkhangelsk	948	291	1580	0.015	0.12	0.002	0.004	32	0.015	wt (Ser91, Asp95)	wt (Ser87, Glu91)	wt (Val57)	wt	wt (Leu421)	wt	wt	wt	wt	wt (Gly120, Ala121)	–	–
125	07/15/39	Arkhangelsk	2009	812	12524	1	1	0.008	16	32	0.03	Phe91, Gly95	Arg87, Glu91	Met57	ins345Asp	Pro421	wt	wt	wt	-35delA	wt (Gly120, Ala121)	–	–
126	07/15/40	Arkhangelsk	266	118	387	0.25	0.25	0.002	16	32	0.03	wt (Ser91, Asp95)	wt (Ser87, Glu91)	wt (Val57)	ins345Asp	wt (Leu421)	wt	wt	wt	wt	wt (Gly120, Ala121)	–	–
127	07/15/41	Arkhangelsk	2037	118	12444	0.06	0.5	0.002	0.004	32	0.015	wt (Ser91, Asp95)	wt (Ser87, Glu91)	wt (Val57)	ins345Asp	wt (Leu421)	wt	wt	wt	wt	wt (Gly120, Ala121)	–	–
128	07/15/42	Arkhangelsk	383	1714	9486	0.06	0.5	0.002	0.004	32	0.015	wt (Ser91, Asp95)	wt (Ser87, Glu91)	wt (Val57)	ins345Asp	wt (Leu421)	wt	wt	wt	wt	wt (Gly120, Ala121)	–	–
129	07/15/43	Arkhangelsk	37	1124	12529	0.12	0.25	0.008	0.008	32	0.015	wt (Ser91, Asp95)	wt (Ser87, Glu91)	wt (Val57)	ins345Asp	wt (Leu421)	wt	wt	wt	wt	wt (Gly120, Ala121)	–	–
130	07/15/44	Arkhangelsk	975	27	1544	0.12	0.5	0.004	0.004	16	0.015	wt (Ser91, Asp95)	wt (Ser87, Glu91)	wt (Val57)	ins345Asp	wt (Leu421)	wt	wt	wt	wt	wt (Gly120, Ala121)	–	–
131	07/15/45	Arkhangelsk	7324	27	12530	0.06	0.06	0.004	0.008	32	0.004	wt (Ser91, Asp95)	wt (Ser87, Glu91)	wt (Val57)	ins345Asp	wt (Leu421)	wt	wt	wt	wt	wt (Gly120, Ala121)	–	–
132	07/15/46	Arkhangelsk	1642	27	12555	0.5	0.5	0.008	4	32	0.008	Phe91, Gly95	Arg87, Glu91	Met57	ins345Asp	Pro421	wt	wt	wt	wt	wt (Gly120, Ala121)	–	–
133	07/15/47	Arkhangelsk	5619	4	9476	0.25	1	0.004	8	32	0.008	Phe91, Gly95	Arg87, Glu91	Met57	ins345Asp	Pro421	wt	wt	wt	wt	Asp120, Ala121	–	–
134	07/15/48	Arkhangelsk	5619	4	9476	0.5	0.5	0.002	4	32	0.015	Phe91, Gly95	Arg87, Glu91	Met57	ins345Asp	Pro421	wt	wt	wt	wt	Asp120, Ala121	–	–
135	07/15/49	Arkhangelsk	5623	27	9480	0.25	0.06	0.25	0.5	32	0.008	wt (Ser91, Asp95)	wt (Ser87, Glu91)	wt (Val57)	ins345Asp	wt (Leu421)	wt	wt	wt	wt	Asp120, Ala121	–	–
136	07/15/50	Arkhangelsk	1642	27	12555	0.25	0.5	0.002	8	8	0.008	Phe91, Gly95	Arg87, Glu91	Met57	ins345Asp	Pro421	wt	wt	wt	wt	wt (Gly120, Ala121)	–	–
137	07/15/51	Arkhangelsk	745	2108	12560	0.12	0.25	0.002	0.004	32	0.004	wt (Ser91, Asp95)	wt (Ser87, Glu91)	wt (Val57)	wt	wt (Leu421)	wt	wt	wt	wt	wt (Gly120, Ala121)	–	–
138	07/15/52	Arkhangelsk	7377	6	12603	0.03	0.25	0.002	0.002	64	0.03	wt (Ser91, Asp95)	wt (Ser87, Glu91)	wt (Val57)	wt	wt (Leu421)	wt	wt	wt	wt	wt (Gly120, Ala121)	–	–
139	07/15/53	Arkhangelsk	975	27	1544	0.25	0.12	0.002	0.002	32	0.015	wt (Ser91, Asp95)	wt (Ser87, Glu91)	wt (Val57)	ins345Asp	wt (Leu421)	wt	wt	wt	wt	wt (Gly120, Ala121)	–	–
140	07/15/54	Arkhangelsk	5619	4	9476	0.5	2	0.002	4	32	0.015	Phe91, Gly95	Arg87, Glu91	wt (Val57)	ins345Asp	Pro421	wt	wt	wt	wt	Asp120, Ala121	–	–
141	07/15/55	Arkhangelsk	37	27	807	0.12	0.12	0.002	0.002	32	0.008	wt (Ser91, Asp95)	wt (Ser87, Glu91)	wt (Val57)	ins345Asp	wt (Leu421)	wt	wt	wt	wt	wt (Gly120, Ala121)	–	–
142	07/15/56	Arkhangelsk	7325	25	12531	0.5	0.12	0.002	0.002	32	0.008	wt (Ser91, Asp95)	wt (Ser87, Glu91)	wt (Val57)	ins345Asp	wt (Leu421)	wt	wt	wt	wt	wt (Gly120, Ala121)	–	–
143	07/15/57	Arkhangelsk	975	27	1544	0.25	0.5	0.002	0.008	32	0.008	wt (Ser91, Asp95)	wt (Ser87, Glu91)	wt (Val57)	ins345Asp	wt (Leu421)	wt	wt	wt	wt	wt (Gly120, Ala121)	–	–
144	07/15/58	Arkhangelsk	7376	174	12602	0.015	0.06	0.002	0.004	32	0.008	wt (Ser91, Asp95)	wt (Ser87, Glu91)	wt (Val57)	wt	wt (Leu421)	wt	wt	wt	wt	wt (Gly120, Ala121)	–	–
145	07/15/59	Arkhangelsk	974	27	1531	0.12	0.25	0.008	0.004	32	0.015	wt (Ser91, Asp95)	wt (Ser87, Glu91)	wt (Val57)	ins345Asp	wt (Leu421)	wt	wt	wt	wt	wt (Gly120, Ala121)	–	–
146	07/15/60	Arkhangelsk	37	27	807	0.03	0.12	0.002	0.004	32	0.008	wt (Ser91, Asp95)	wt (Ser87, Glu91)	wt (Val57)	ins345Asp	wt (Leu421)	wt	wt	wt	wt	wt (Gly120, Ala121)	–	–
147	07/15/61	Arkhangelsk	7336	27	12557	0.015	0.5	0.002	0.004	32	0.008	wt (Ser91, Asp95)	wt (Ser87, Glu91)	wt (Val57)	ins345Asp	wt (Leu421)	wt	wt	wt	wt	wt (Gly120, Ala121)	–	–
148	07/15/62	Arkhangelsk	5619	4	9476	0.25	0.5	0.004	8	32	0.008	Phe91, Gly95	Arg87, Glu91	Met57	ins345Asp	Pro421	wt	wt	wt	wt	Asp120, Ala121	–	–
149	07/15/63	Arkhangelsk	266	118	387	0.015	0.06	0.002	0.004	32	0.015	wt (Ser91, Asp95)	wt (Ser87, Glu91)	wt (Val57)	wt	wt (Leu421)	wt	wt	wt	wt	wt (Gly120, Ala121)	–	–
150	07/15/64	Arkhangelsk	5619	4	9476	0.5	0.5	0.008	8	32	0.008	Phe91, Gly95	Arg87, Glu91	Met57	ins345Asp	Pro421	wt	wt	wt	wt	Asp120, Ala121	–	–
151	14/17/07	Astrakhan	8491	1218	14600	0.5	2	0.004	8	16	0.06	Phe91, Ala 95	wt (Ser87, Glu91)	Met57	ins345Asp	Pro421	wt	wt	wt	wt	wt (Gly120, Ala121)	–	–
152	14/17/04	Astrakhan	37	27	807	0.25	0.12	0.002	0.004	32	0.06	Thr91, Gly95	wt (Ser87, Glu91)	wt (Val57)	ins345Asp	wt (Leu421)	wt	wt	wt	wt	wt (Gly120, Ala121)	–	–
153	14/17/05	Astrakhan	5136	18	16169	1	0.5	0.002	8	32	0.03	Phe91, Asn 95	Arg 87, Glu91	Met57	ins345Asp	Pro421	wt	wt	wt	wt	Gly120, Gly121	–	–
154	14/17/03	Astrakhan	1489	2579	16170	0.5	2	0.015	16	32	0.12	Phe91, Asn 95	Ser87, Gly91	Met57	ins345Asp	Pro421	wt	wt	wt	-35delA	Asn120, Asp121	–	–
155	14/17/06	Astrakhan	30	18	5441	0.12	1	0.002	0.004	32	0.06	Thr91, Gly95	wt (Ser87, Glu91)	wt (Val57)	ins345Asp	Pro421	wt	wt	wt	-35delA	wt (Gly120, Ala121)	–	–
156	14/17/14	Astrakhan	1257	1991	14006	0.12	0.5	0.004	0.008	16	0.12	Thr 91, Asp95	wt (Ser87, Glu91)	wt (Val57)	wt	wt (Leu421)	wt	wt	wt	wt	wt (Gly120, Ala121)	–	–
157	14/17/09	Astrakhan	9404	629	16172	0.06	0.5	0.002	0.12	16	0.06	Thr91, Gly95	wt (Ser87, Glu91)	Met57	ins345Asp	Pro421	wt	wt	wt	wt	wt (Gly120, Ala121)	–	–
158	14/17/10	Astrakhan	8491	1218	14600	0.25	0.25	0.004	0.015	32	0.12	Thr91, Gly95	wt (Ser87, Glu91)	Met57	wt	Pro421	wt	wt	wt	wt	wt (Gly120, Ala121)	–	–
159	14/17/23	Astrakhan	738	273	5711	0.25	1	0.008	8	32	0.25	Phe91, Asn 95	Ser87, Gly 91	Met57	ins345Asp	Pro421	wt	wt	wt	wt	wt (Gly120, Ala121)	–	–
160	14/17/22	Astrakhan	738	6	5714	0.015	0.5	0.002	0.015	32	0.25	Thr91, Gly95	wt (Ser87, Glu91)	wt (Val57)	wt	wt (Leu421)	wt	wt	wt	wt	wt (Gly120, Ala121)	–	–
161	14/17/24	Astrakhan	9403	2600	16171	0.25	1	0.002	0.008	16	0.12	Thr91, Gly95	wt (Ser87, Glu91)	Met57	ins345Asp	wt (Leu421)	wt	wt	wt	wt	wt (Gly120, Ala121)	–	–
162	14/17/12	Astrakhan	9404	629	16172	0.5	0.5	0.015	0.002	12	0.06	Thr91, Gly95	wt (Ser87, Glu91)	Met57	ins345Asp	Pro421	wt	wt	wt	wt	wt (Gly120, Ala121)	–	–
163	14/16/39	Astrakhan	8615	118	14825	0.015	0.06	0.002	0.002	16	0.03	wt (Ser91, Asp95)	wt (Ser87, Glu91)	wt (Val57)	wt	wt (Leu421)	wt	wt	wt	wt	wt (Gly120, Ala121)	–	–
164	14/16/29	Astrakhan	3059	29	5049	0.06	0.5	0.002	0.004	32	0.5	wt (Ser91, Asp95)	wt (Ser87, Glu91)	wt (Val57)	ins345Asp	wt (Leu421)	wt	wt	wt	wt	wt (Gly120, Ala121)	–	–
165	14/16/26	Astrakhan	8491	1218	14600	0.015	0.12	0.002	0.004	16	0.06	wt (Ser91, Asp95)	wt (Ser87, Glu91)	wt (Val57)	wt	wt (Leu421)	wt	wt	wt	wt	wt (Gly120, Ala121)	–	–
166	14/16/30	Astrakhan	8078	629	14003	0.12	0.5	0.002	0.004	16	0.12	wt (Ser91, Asp95)	wt (Ser87, Glu91)	wt (Val57)	ins345Asp	Pro421	wt	wt	wt	wt	wt (Gly120, Ala121)	–	–
167	14/16/22	Astrakhan	8078	629	14003	0.12	0.5	0.004	0.002	8	0.12	wt (Ser91, Asp95)	wt (Ser87, Glu91)	Met57	ins345Asp	Pro421	wt	wt	wt	wt	wt (Gly120, Ala121)	–	–
168	14/16/38	Astrakhan	1257	6	1993	0.015	0.25	0.002	0.004	16	0.12	wt (Ser91, Asp95)	wt (Ser87, Glu91)	wt (Val57)	wt	wt (Leu421)	wt	wt	wt	wt	wt (Gly120, Ala121)	–	–
169	14/16/06	Astrakhan	738	6	5714	0.015	0.12	0.002	0.002	16	0.06	wt (Ser91, Asp95)	wt (Ser87, Glu91)	wt (Val57)	wt	wt (Leu421)	wt	wt	wt	wt	wt (Gly120, Ala121)	–	–
170	14/16/03	Astrakhan	8078	629	14003	0.06	0.5	0.002	0.002	8	0.06	wt (Ser91, Asp95)	wt (Ser87, Glu91)	Met57	ins345Asp	Pro421	wt	wt	wt	wt	wt (Gly120, Ala121)	–	–
171	14/16/25	Astrakhan	266	2445	14598	0.12	0.5	0.004	4	16	0.12	Ser91, Asn95	Arg87, Glu91	Met57	ins345Asp	Pro421	wt	wt	wt	wt	wt (Gly120, Ala121)	–	–
172	14/16/32	Astrakhan	8473	2453	14601	0.12	1	0.008	0.004	32	0.12	wt (Ser91, Asp95)	Arg87, Glu91	Met57	ins345Asp	Pro421	wt	wt	wt	wt	wt (Gly120, Ala121)	–	–
173	14/16/27	Astrakhan	1257	1991	14006	0.015	0.12	0.002	0.004	32	0.25	Ser91, Asn95	wt (Ser87, Glu91)	wt (Val57)	wt	wt (Leu421)	wt	wt	wt	wt	wt (Gly120, Ala121)	–	–
174	14/16/37	Astrakhan	1257	1991	14006	0.015	0.25	0.002	0.12	32	0.06	Phe91, Asn95	wt (Ser87, Glu91)	Met57	wt	Pro421	wt	wt	wt	-35delA	wt (Gly120, Ala121)	–	–
175	14/16/36	Astrakhan	8479	27	14602	0.015	0.25	0.002	0.004	32	0.12	wt (Ser91, Asp95)	wt (Ser87, Glu91)	wt (Val57)	wt	wt (Leu421)	wt	wt	wt	wt	wt (Gly120, Ala121)	–	–
176	14/16/31	Astrakhan	1257	1991	14006	0.015	0.5	0.002	0.004	16	0.25	wt (Ser91, Asp95)	wt (Ser87, Glu91)	wt (Val57)	wt	wt (Leu421)	wt	wt	wt	wt	wt (Gly120, Ala121)	–	–
177	14/16/35	Astrakhan	1257	1991	14006	0.015	0.06	0.002	0.002	16	0.12	wt (Ser91, Asp95)	wt (Ser87, Glu91)	wt (Val57)	wt	wt (Leu421)	wt	wt	wt	wt	wt (Gly120, Ala121)	–	–
178	14/16/04	Astrakhan	1257	6	1993	0.015	0.5	0.002	0.008	32	0.12	wt (Ser91, Asp95)	wt (Ser87, Glu91)	wt (Val57)	wt	wt (Leu421)	wt	wt	wt	wt	wt (Gly120, Ala121)	–	–
179	14/16/24	Astrakhan	1257	6	1993	0.015	0.25	0.002	0.002	16	0.12	wt (Ser91, Asp95)	wt (Ser87, Glu91)	wt (Val57)	wt	wt (Leu421)	wt	wt	wt	wt	wt (Gly120, Ala121)	–	–
180	14/16/21	Astrakhan	8484	2449	14597	0.03	0.5	0.002	0.004	16	0.06	wt (Ser91, Asp95)	wt (Ser87, Glu91)	Met57	ins345Asp	Pro421	wt	wt	wt	wt	wt (Gly120, Ala121)	–	–
181	14/16/40	Astrakhan	1489	563	2400	0.25	1	0.015	16	16	0.25	Ser91, Asn95	Ser87, Gly 91	Met57	ins345Asp	Pro421	wt	wt	wt	-35delA	Asn120, Asp121	–	–
182	14/16/02	Astrakhan	8078	629	14003	0.06	0.5	0.008	0.004	8	0.06	Ser91, Asn95	wt (Ser87, Glu91)	Met57	ins345Asp	Pro421	wt	wt	wt	wt	wt (Gly120, Ala121)	–	–
183	14/16/34	Astrakhan	8486	674	14603	0.03	1	0.002	0.004	8	0.06	wt (Ser91, Asp95)	wt (Ser87, Glu91)	Met57	ins345Asp	wt (Leu421)	wt	wt	wt	wt	wt (Gly120, Ala121)	–	–
184	14/16/23	Astrakhan	37	27	807	0.03	0.06	0.002	0.004	8	0.06	wt (Ser91, Asp95)	Arg87, Glu91	wt (Val57)	ins345Asp	wt (Leu421)	wt	wt	wt	wt	wt (Gly120, Ala121)	–	–
185	14/16/28	Astrakhan	8478	2445	14599	0.12	0.5	0.004	4	16	0.06	Phe91, Asn95	Arg87, Glu91	Met57	ins345Asp	Pro421	wt	wt	wt	wt	wt (Gly120, Ala121)	–	–
186	14/16/33	Astrakhan	8080	27	14005	0.015	0.06	0.002	0.002	8	0.015	wt (Ser91, Asp95)	wt (Ser87, Glu91)	wt (Val57)	ins345Asp	wt (Leu421)	wt	wt	wt	wt	wt (Gly120, Ala121)	–	–
187	14/16/01	Astrakhan	738	72	13366	0.25	2	0.002	8	32	0.5	Phe91, Asn95	Ser87, Gly91	Met57	ins345Asp	Pro421	wt	wt	wt	-35delA	wt (Gly120, Ala121)	–	–
188	14/16/07	Astrakhan	8078	629	14003	0.03	0.12	0.002	0.002	4	0.06	wt (Ser91, Asp95)	wt (Ser87, Glu91)	Met57	ins345Asp	Pro421	wt	wt	wt	wt	wt (Gly120, Ala121)	–	–
189	14/16/08	Astrakhan	1489	563	2400	0.25	4	0.008	32	32	0.25	Phe91, Gly95	Ser87, Gly91	Met57	ins345Asp	Pro421	wt	wt	wt	-35delA	Asn120, Asp121	–	–
190	14/16/09	Astrakhan	8079	2386	14002	0.25	1	0.008	0.008	16	0.06	wt (Ser91, Asp95)	Arg87, Glu91	Met57	ins345Asp	Pro421	wt	wt	wt	wt	wt (Gly120, Ala121)	–	–
191	14/16/10	Astrakhan	1489	563	2400	0.5	2	0.015	16	16	0.12	Phe91, Asp95	Ser87, Gly 91	wt (Val57)	ins345Asp	wt (Leu421)	wt	wt	wt	wt	Asn120, Asp121	–	–
192	14/16/11	Astrakhan	1489	563	2400	0.5	2	0.015	16	16	0.12	Phe91, Gly95	Ser87, Gly91	Met57	ins345Asp	Pro421	wt	wt	wt	-35delA	Asn120, Asp121	–	–
193	14/16/12	Astrakhan	8078	629	14003	0.12	0.5	0.002	0.004	16	0.12	wt (Ser91, Asp95)	wt (Ser87, Glu91)	Met57	ins345Asp	Pro421	wt	wt	wt	wt	wt (Gly120, Ala121)	–	–
194	14/16/05	Astrakhan	1257	6	1993	0.015	0.12	0.002	0.002	16	0.12	wt (Ser91, Asp95)	wt (Ser87, Glu91)	wt (Val57)	wt	wt (Leu421)	wt	wt	wt	wt	wt (Gly120, Ala121)	–	–
195	14/16/13	Astrakhan	738	6	5714	0.015	0.03	0.002	0.002	4	0.06	wt (Ser91, Asp95)	wt (Ser87, Glu91)	wt (Val57)	wt	wt (Leu421)	wt	wt	wt	wt	wt (Gly120, Ala121)	–	–
196	14/16/14	Astrakhan	8077	563	14004	0.12	1	0.008	4	16	0.12	Phe91, Gly95	Ser87, Gly91	Met57	ins345Asp	Pro421	wt	wt	wt	-35delA	wt (Gly120, Ala121)	–	–
197	14/16/15	Astrakhan	8078	629	14003	0.06	0.5	0.002	0.004	8	0.12	wt (Ser91, Asp95)	wt (Ser87, Glu91)	Met57	ins345Asp	Pro421	wt	wt	wt	wt	wt (Gly120, Ala121)	–	–
198	14/16/16	Astrakhan	997	2452	14596	16	32	0.008	16	16	0.03	Phe91, Asp95	Asn 87, Lys91	Met57	ins345Asp	Pro421	wt	wt	wt	wt	Lys 120, Gly121	tetM	blaTEM (African)
199	14/16/17	Astrakhan	1257	6	1993	0.015	0.12	0.008	0.002	16	0.03	wt (Ser91, Asp95)	wt (Ser87, Glu91)	wt (Val57)	wt	wt (Leu421)	wt	wt	wt	wt	wt (Gly120, Ala121)	–	–
200	14/16/18	Astrakhan	1257	6	1993	0.015	0.25	0.002	0.004	32	0.12	wt (Ser91, Asp95)	wt (Ser87, Glu91)	wt (Val57)	wt	wt (Leu421)	wt	wt	wt	wt	wt (Gly120, Ala121)	–	–
201	14/16/20	Astrakhan	738	6	5714	0.015	0.25	0.002	0.004	32	0.25	wt (Ser91, Asp95)	wt (Ser87, Glu91)	wt (Val57)	wt	wt (Leu421)	wt	wt	wt	wt	wt (Gly120, Ala121)	–	–
202	14/16/41	Astrakhan	37	27	807	0.015	0.06	0.002	0.002	8	0.06	wt (Ser91, Asp95)	wt (Ser87, Glu91)	wt (Val57)	ins345Asp	wt (Leu421)	wt	wt	wt	wt	wt (Gly120, Ala121)	–	–
203	14/16/42	Astrakhan	8663	2445	14931	0.12	1	0.004	8	16	0.5	Phe91, Gly95	Arg87, Glu91	Met57	ins345Asp	Pro421	wt	wt	wt	-35delA	wt (Gly120, Ala121)	–	–
204	14/16/43	Astrakhan	1257	1991	14006	0.015	0.25	0.002	0.004	8	0.12	Phe91, Gly95	Arg87, Glu91	Met57	ins345Asp	Pro421	wt	wt	wt	-35delA	wt (Gly120, Ala121)	–	–
205	14/16/44	Astrakhan	37	27	807	0.015	0.06	0.002	0.004	8	0.06	wt (Ser91, Asp95)	wt (Ser87, Glu91)	wt (Val57)	wt	wt (Leu421)	wt	wt	wt	wt	wt (Gly120, Ala121)	–	–
206	36/17/02	Bryansk	90	75	1751	0.06	4	0.002	0.5	16	0.03	Phe91, Ala 95	Arg 87, Glu91	Met57	ins345Asp	wt (Leu421)	wt	wt	wt	wt	Asp120, Gly121	tetM	–
207	36/17/03	Bryansk	90	75	1751	0.06	4	0.002	0.5	16	0.015	Thr91, Gly95	wt (Ser87, Glu91)	Met57	ins345Asp	Pro421	wt	wt	wt	wt	Asp120, Gly121	tetM	–
208	36/17/04	Bryansk	90	75	1751	0.06	4	0.002	2	16	0.03	Phe91, Asn 95	wt (Ser87, Glu91)	Met57	ins345Asp	Pro421	wt	wt	wt	wt	Asp120, Gly121	tetM	–
209	36/16/01	Bryansk	23	764	13054	0.06	0.25	0.015	0.004	16	0.03	wt (Ser91, Asp95)	wt (Ser87, Glu91)	wt (Val57)	ins345Asp	wt (Leu421)	wt	wt	wt	wt	wt (Gly120, Ala121)	–	–
210	36/16/02	Bryansk	23	764	13054	0.06	0.12	0.002	0.004	16	0.03	wt (Ser91, Asp95)	wt (Ser87, Glu91)	wt (Val57)	ins345Asp	wt (Leu421)	wt	wt	wt	wt	wt (Gly120, Ala121)	–	–
211	36/16/03	Bryansk	23	764	13054	0.06	0.12	0.008	0.004	16	0.03	wt (Ser91, Asp95)	wt (Ser87, Glu91)	wt (Val57)	ins345Asp	wt (Leu421)	wt	wt	wt	wt	wt (Gly120, Ala121)	–	–
212	36/16/07	Bryansk	7732	25	13317	0.5	2	0.015	32	8	0.12	Phe91, Asn95	Arg87, Glu91	Met57	ins345Asp	Pro421	wt	wt	wt	-35delA	Lys 120, Asn 121	–	–
213	36/16/06	Bryansk	7752	4	13364	0.5	0.5	0.008	4	8	0.25	Phe91, Asn95	Arg87, Glu91	Met57	ins345Asp	Pro421	wt	wt	wt	-35delA	Thr 120, Asn 121	–	–
214	36/16/05	Bryansk	7752	4	13364	1	1	0.03	8	16	0.25	Phe91, Asn95	Arg87, Glu91	Met57	ins345Asp	Pro421	wt	wt	wt	-35delA	Thr 120, Asn 121	–	–
215	36/16/04	Bryansk	7752	4	13364	1	1	0.03	8	32	0.5	Phe91, Asn95	Arg87, Glu91	Met57	ins345Asp	Pro421	wt	wt	wt	-35delA	Thr 120, Asn 121	–	–
216	36/16/08	Bryansk	8616	2056	14826	32	16	0.002	2	16	0.06	Phe91, Asp95	wt (Ser87, Glu91)	Met57	ins345Asp	wt (Leu421)	wt	wt	wt	wt	wt (Gly120, Ala121)	tetM	blaTEM (African)
217	36/16/09	Bryansk	8616	2056	14826	32	16	0.002	2	32	0.06	Phe91, Asp95	wt (Ser87, Glu91)	Met57	ins345Asp	wt (Leu421)	wt	wt	wt	wt	wt (Gly120, Ala121)	tetM	blaTEM (African)
218	36/16/10	Bryansk	8616	2056	14826	32	16	0.002	4	32	0.12	Phe91, Asp95	wt (Ser87, Glu91)	Met57	ins345Asp	wt (Leu421)	wt	wt	wt	wt	wt (Gly120, Ala121)	tetM	blaTEM (African)
219	36/16/11	Bryansk	8616	2056	14826	32	16	0.002	1	32	0.12	Phe91, Asp95	wt (Ser87, Glu91)	Met57	ins345Asp	wt (Leu421)	wt	wt	wt	wt	wt (Gly120, Ala121)	tetM	blaTEM (African)
220	36/16/12	Bryansk	8616	2056	14826	32	16	0.002	4	16	0.12	Phe91, Asp95	wt (Ser87, Glu91)	Met57	ins345Asp	wt (Leu421)	wt	wt	wt	wt	wt (Gly120, Ala121)	tetM	blaTEM (African)
221	36/16/13	Bryansk	8616	2056	14826	32	16	0.002	1	8	0.06	Phe91, Asp95	wt (Ser87, Glu91)	Met57	ins345Asp	wt (Leu421)	wt	wt	wt	wt	wt (Gly120, Ala121)	tetM	blaTEM (African)
222	36/16/14	Bryansk	8616	2056	14826	32	16	0.002	1	8	0.06	Phe91, Asp95	wt (Ser87, Glu91)	Met57	ins345Asp	wt (Leu421)	wt	wt	wt	wt	wt (Gly120, Ala121)	tetM	blaTEM (African)
223	36/15/03	Bryansk	3463	189	5792	0.25	0.5	0.002	0.002	4	0.03	wt (Ser91, Asp95)	wt (Ser87, Glu91)	Met57	ins345Asp	wt (Leu421)	wt	wt	wt	wt	wt (Gly120, Ala121)	–	–
224	36/15/04	Bryansk	3463	189	5792	0.25	0.5	0.002	0.002	4	0.015	wt (Ser91, Asp95)	wt (Ser87, Glu91)	Met57	ins345Asp	wt (Leu421)	wt	wt	wt	wt	wt (Gly120, Ala121)	–	–
225	36/15/05	Bryansk	3463	189	5792	0.25	0.5	0.002	0.002	4	0.015	wt (Ser91, Asp95)	wt (Ser87, Glu91)	Met57	ins345Asp	wt (Leu421)	wt	wt	wt	wt	wt (Gly120, Ala121)	–	–
226	36/15/01	Bryansk	37	27	807	0.06	0.06	0.004	0.008	4	0.03	wt (Ser91, Asp95)	wt (Ser87, Glu91)	wt (Val57)	ins345Asp	wt (Leu421)	wt	wt	wt	wt	wt (Gly120, Ala121)	–	–
227	36/15/02	Bryansk	37	27	807	0.03	0.06	0.002	0.008	4	0.03	wt (Ser91, Asp95)	wt (Ser87, Glu91)	wt (Val57)	ins345Asp	wt (Leu421)	wt	wt	wt	wt	wt (Gly120, Ala121)	–	–
228	36/15/07	Bryansk	23	764	13054	0.06	0.25	0.008	0.008	16	0.06	wt (Ser91, Asp95)	wt (Ser87, Glu91)	wt (Val57)	ins345Asp	wt (Leu421)	wt	wt	wt	wt	wt (Gly120, Ala121)	–	–
229	36/15/08	Bryansk	23	764	13054	0.06	0.12	0.008	0.004	16	0.03	wt (Ser91, Asp95)	wt (Ser87, Glu91)	wt (Val57)	ins345Asp	wt (Leu421)	wt	wt	wt	wt	wt (Gly120, Ala121)	–	–
230	36/15/09	Bryansk	23	764	13054	0.06	0.5	0.008	0.002	16	0.12	wt (Ser91, Asp95)	wt (Ser87, Glu91)	wt (Val57)	ins345Asp	wt (Leu421)	wt	wt	wt	wt	wt (Gly120, Ala121)	–	–
231	36/15/06	Bryansk	7590	2256	13059	0.06	0.06	0.002	0.002	4	0.03	wt (Ser91, Asp95)	wt (Ser87, Glu91)	wt (Val57)	ins345Asp	Pro421	wt	wt	wt	wt	wt (Gly120, Ala121)	–	–
232	34/17/01	Chelyabinsk	1808	4	8845	0.25	1	0.03	8	32	0.06	Phe91, Asn95	wt (Ser87, Glu91)	Met57	ins345Asp	Pro421	wt	wt	wt	-35delA	wt (Gly120, Ala121)	–	–
233	34/16/01	Chelyabinsk	908	563	7574	0.12	0.5	0.008	16	32	0.25	Phe91, Asn95	Ser87, Gly91	Met57	ins345Asp	Pro421	wt	wt	wt	-35delA	Lys 120, Asn 121	–	–
234	34/16/02	Chelyabinsk	3369	2451	14630	0.015	0.5	0.002	4	32	0.12	Phe91, Asn95	Arg87, Glu91	Met57	ins345Asp	wt (Leu421)	wt	wt	wt	wt	Asp120, Gly121	–	–
235	34/16/03	Chelyabinsk	8494	75	14629	0.12	0.5	0.008	4	8	0.12	Phe91, Asn95	wt (Ser87, Glu91)	Met57	ins345Asp	Pro421	wt	wt	wt	wt	Asp120, Gly121	–	–
236	12/17/20	Chuvashiya	2674	393	5218	0.06	8	0.004	0.008	32	0.06	Thr91, Gly95	wt (Ser87, Glu91)	wt (Val57)	wt	wt (Leu421)	wt	wt	wt	wt	wt (Gly120, Ala121)	tetM	–
237	12/17/24	Chuvashiya	1257	6	1993	0.06	16	0.002	0.008	32	0.006	Thr91, Gly95	wt (Ser87, Glu91)	wt (Val57)	wt	wt (Leu421)	wt	wt	wt	wt	wt (Gly120, Ala121)	tetM	–
238	12/17/25	Chuvashiya	1642	6	6226	2	2	0.004	16	32	0.12	Phe91, Asn 95	Arg 87, Glu91	Met57	ins345Asp	wt (Leu421)	wt	wt	wt	wt	wt (Gly120, Ala121)	–	–
239	12/17/26	Chuvashiya	2674	393	5218	0.06	16	0.008	16	4	0.06	Thr91, Gly95	wt (Ser87, Glu91)	wt (Val57)	wt	wt (Leu421)	wt	wt	wt	wt	wt (Gly120, Ala121)	tetM	–
240	12/17/31	Chuvashiya	2674	393	5218	0.06	16	0.004	0.008	4	0.12	Thr91, Gly95	wt (Ser87, Glu91)	wt (Val57)	wt	wt (Leu421)	wt	wt	wt	wt	wt (Gly120, Ala121)	tetM	–
241	12/17/34	Chuvashiya	2674	393	5218	0.12	16	0.008	0.008	16	0.12	Thr91, Gly95	wt (Ser87, Glu91)	wt (Val57)	wt	wt (Leu421)	wt	wt	wt	wt	wt (Gly120, Ala121)	tetM	–
242	12/17/11	Chuvashiya	37	27	807	0.12	0.5	0.015	0.004	16	0.12	Thr91, Gly95	Arg87, Glu91	wt (Val57)	ins345Asp	wt (Leu421)	wt	wt	wt	wt	wt (Gly120, Ala121)	–	–
243	12/17/30	Chuvashiya	37	27	807	0.25	0.12	0.004	0.008	32	0.25	Thr91, Gly95	wt (Ser87, Glu91)	wt (Val57)	wt	wt (Leu421)	wt	wt	wt	wt	wt (Gly120, Ala121)	–	–
244	12/17/32	Chuvashiya	1642	6	6226	0.5	0.25	0.004	16	16	0.12	Phe91, Asn95	Arg87, Glu91	Met57	ins345Asp	Pro421	wt	wt	wt	wt	wt (Gly120, Ala121)	–	–
245	12/17/28	Chuvashiya	5743	4	15747	0.5	1	0.008	8	32	0.06	Phe91, Asn95	Arg87, Glu91	Met57	ins345Asp	Pro421	wt	wt	wt	wt	Asp120, Gly121	–	–
246	12/17/25	Chuvashiya	1642	6	6226	2	2	0.004	16	32	0.12	Phe91, Asn95	Arg 87, Glu91	Met57	ins345Asp	Pro421	wt	wt	wt	wt	wt (Gly120, Ala121)	–	–
247	12/17/26	Chuvashiya	2674	393	5218	0.06	16	0.008	16	4	0.06	Thr91, Gly95	wt (Ser87, Glu91)	wt (Val57)	wt	wt (Leu421)	wt	wt	wt	wt	wt (Gly120, Ala121)	tetM	–
248	12/17/27	Chuvashiya	1750	2554	15749	0.12	0.03	0.004	0.008	16	0.06	Thr91, Gly95	wt (Ser87, Glu91)	wt (Val57)	wt	wt (Leu421)	wt	wt	wt	wt	wt (Gly120, Ala121)	–	–
249	12/17/21	Chuvashiya	402	33	5785	0.25	32	0.008	8	32	0.25	Phe91, Asn95	Arg87, Glu91	Met57	ins345Asp	wt (Leu421)	wt	wt	wt	-35delA	Gly120, Gly121	tetM	–
250	12/17/37	Chuvashiya	37	27	807	0.25	0.12	0.002	0.004	16	0.06	Thr91, Gly95	wt (Ser87, Glu91)	wt (Val57)	wt	wt (Leu421)	wt	wt	wt	-35delA	wt (Gly120, Ala121)	–	–
251	12/17/38	Chuvashiya	402	33	5785	0.25	16	0.008	8	32	0.12	Phe91, Asn95	Arg87, Glu91	Met57	ins345Asp	wt (Leu421)	wt	wt	wt	-35delA	Gly120, Gly121	tetM	–
252	12/17/41	Chuvashiya	2674	393	5218	0.06	8	0.002	0.004	16	0.06	Thr91, Gly95	wt (Ser87, Glu91)	wt (Val57)	wt	wt (Leu421)	wt	wt	wt	wt	wt (Gly120, Ala121)	tetM	–
253	12/17/42	Chuvashiya	421	629	5718	0.06	0.5	0.002	0.004	16	0.015	Thr91, Gly95	wt (Ser87, Glu91)	Met57	ins345Asp	Pro421	wt	wt	wt	wt	wt (Gly120, Ala121)	–	–
254	12/17/43	Chuvashiya	421	629	5718	0.06	0.5	0.002	0.004	16	0.015	Thr91, Gly95	wt (Ser87, Glu91)	Met57	ins345Asp	Pro421	wt	wt	wt	wt	wt (Gly120, Ala121)	–	–
255	12/17/45	Chuvashiya	37	27	807	0.25	0.25	0.004	0.008	32	0.12	Thr91, Gly95	wt (Ser87, Glu91)	wt (Val57)	wt	wt (Leu421)	wt	wt	wt	wt	wt (Gly120, Ala121)	–	–
256	12/17/36	Chuvashiya	37	27	807	0.12	0.12	0.002	0.004	8	0.06	Thr91, Gly95	wt (Ser87, Glu91)	wt (Val57)	ins345Asp	wt (Leu421)	wt	wt	wt	wt	wt (Gly120, Ala121)	–	–
257	12/17/18	Chuvashiya	37	27	807	0.12	0.12	0.002	0.004	8	0.06	Thr91, Gly95	wt (Ser87, Glu91)	wt (Val57)	ins345Asp	wt (Leu421)	wt	wt	wt	wt	wt (Gly120, Ala121)	–	–
258	12/17/23	Chuvashiya	5860	33	10158	32	8	0.002	4	16	0.06	Phe91, Asn95	wt (Ser87, Glu91)	Met57	wt	wt (Leu421)	wt	wt	wt	wt	wt (Gly120, Ala121)	tetM	blaTEM (Toronto?Rio)
259	12/16/28	Chuvashiya	738	6	5714	0.015	0.25	0.002	0.004	16	0.12	wt (Ser91, Asp95)	wt (Ser87, Glu91)	wt (Val57)	wt	wt (Leu421)	wt	wt	wt	wt	wt (Gly120, Ala121)	–	–
260	12/16/29	Chuvashiya	8482	6	14627	0.015	0.25	0.002	0.008	16	0.25	wt (Ser91, Asp95)	wt (Ser87, Glu91)	wt (Val57)	wt	wt (Leu421)	wt	wt	wt	wt	wt (Gly120, Ala121)	–	–
261	12/16/05	Chuvashiya	23	27	228	0.06	0.25	0.002	0.004	16	0.06	wt (Ser91, Asp95)	wt (Ser87, Glu91)	wt (Val57)	ins345Asp	wt (Leu421)	wt	wt	wt	wt	wt (Gly120, Ala121)	–	–
262	12/16/10	Chuvashiya	5912	29	14617	0.015	0.25	0.002	1	8	0.03	wt (Ser91, Asp95)	wt (Ser87, Glu91)	wt (Val57)	ins345Asp	wt (Leu421)	wt	wt	wt	wt	wt (Gly120, Ala121)	–	–
263	12/16/06	Chuvashiya	8485	6	14628	0.015	0.25	0.002	0.002	16	0.12	wt (Ser91, Asp95)	wt (Ser87, Glu91)	wt (Val57)	wt	wt (Leu421)	wt	wt	wt	wt	wt (Gly120, Ala121)	–	–
264	12/16/11	Chuvashiya	8482	6	14627	0.015	0.25	0.002	0.002	16	0.25	wt (Ser91, Asp95)	wt (Ser87, Glu91)	wt (Val57)	ins345Asp	wt (Leu421)	wt	wt	wt	wt	wt (Gly120, Ala121)	–	–
265	12/16/27	Chuvashiya	738	6	5714	0.015	0.25	0.002	0.002	16	0.12	wt (Ser91, Asp95)	wt (Ser87, Glu91)	wt (Val57)	wt	wt (Leu421)	wt	wt	wt	wt	wt (Gly120, Ala121)	–	–
266	12/16/07	Chuvashiya	37	27	807	0.03	0.12	0.002	0.008	16	0.06	wt (Ser91, Asp95)	wt (Ser87, Glu91)	wt (Val57)	wt	wt (Leu421)	wt	wt	wt	wt	wt (Gly120, Ala121)	–	–
267	12/16/04	Chuvashiya	1257	6	1993	0.015	0.12	0.002	0.002	16	0.06	wt (Ser91, Asp95)	wt (Ser87, Glu91)	wt (Val57)	wt	wt (Leu421)	wt	wt	wt	wt	wt (Gly120, Ala121)	–	–
268	12/16/12	Chuvashiya	5912	29	14617	0.5	0.5	0.008	4	16	0.12	wt (Ser91, Asp95)	wt (Ser87, Glu91)	Met57	ins345Asp	wt (Leu421)	wt	wt	wt	wt	wt (Gly120, Ala121)	–	–
269	12/16/17	Chuvashiya	8483	6	14625	0.03	0.12	0.002	0.004	32	0.25	wt (Ser91, Asp95)	wt (Ser87, Glu91)	wt (Val57)	wt	wt (Leu421)	wt	wt	wt	wt	wt (Gly120, Ala121)	–	–
270	12/16/18	Chuvashiya	8480	27	14626	0.12	0.25	0.008	0.004	16	0.12	wt (Ser91, Asp95)	wt (Ser87, Glu91)	wt (Val57)	ins345Asp	wt (Leu421)	wt	wt	wt	wt	wt (Gly120, Ala121)	–	–
271	12/16/19	Chuvashiya	1257	6	1993	0.015	0.12	0.002	0.004	16	0.12	wt (Ser91, Asp95)	wt (Ser87, Glu91)	wt (Val57)	wt	wt (Leu421)	wt	wt	wt	wt	wt (Gly120, Ala121)	–	–
272	12/16/20	Chuvashiya	8480	27	14626	0.12	0.12	0.008	0.004	16	0.12	wt (Ser91, Asp95)	wt (Ser87, Glu91)	wt (Val57)	ins345Asp	wt (Leu421)	wt	wt	wt	wt	wt (Gly120, Ala121)	–	–
273	12/16/15	Chuvashiya	1257	6	1993	0.015	0.12	0.002	0.004	16	0.12	wt (Ser91, Asp95)	wt (Ser87, Glu91)	wt (Val57)	wt	wt (Leu421)	wt	wt	wt	wt	wt (Gly120, Ala121)	–	–
274	12/16/16	Chuvashiya	8483	6	14625	0.015	0.25	0.002	0.004	32	0.25	wt (Ser91, Asp95)	wt (Ser87, Glu91)	wt (Val57)	wt	wt (Leu421)	wt	wt	wt	wt	wt (Gly120, Ala121)	–	–
275	12/16/13	Chuvashiya	2792	27	4570	0.06	0.12	0.008	0.004	16	0.06	wt (Ser91, Asp95)	wt (Ser87, Glu91)	wt (Val57)	ins345Asp	wt (Leu421)	wt	wt	wt	wt	wt (Gly120, Ala121)	–	–
276	12/16/14	Chuvashiya	37	27	807	0.12	0.12	0.002	0.004	16	0.12	wt (Ser91, Asp95)	wt (Ser87, Glu91)	wt (Val57)	ins345Asp	wt (Leu421)	wt	wt	wt	wt	wt (Gly120, Ala121)	–	–
277	12/16/21	Chuvashiya	738	6	5714	0.06	1	0.002	0.004	16	0.25	wt (Ser91, Asp95)	wt (Ser87, Glu91)	wt (Val57)	wt	wt (Leu421)	wt	wt	wt	wt	wt (Gly120, Ala121)	–	–
278	12/16/01	Chuvashiya	738	6	5714	0.015	0.25	0.002	0.004	32	0.12	wt (Ser91, Asp95)	wt (Ser87, Glu91)	wt (Val57)	wt	wt (Leu421)	wt	wt	wt	wt	wt (Gly120, Ala121)	–	–
279	12/16/03	Chuvashiya	7591	2257	13060	0.25	0.5	0.002	8	16	0.06	wt (Ser91, Asp95)	wt (Ser87, Glu91)	wt (Val57)	wt	wt (Leu421)	wt	wt	wt	wt	wt (Gly120, Ala121)	–	–
280	12/16/02	Chuvashiya	421	629	5718	0.25	0.5	0.002	0.002	8	0.12	wt (Ser91, Asp95)	wt (Ser87, Glu91)	Met57	ins345Asp	Pro421	wt	wt	wt	wt	wt (Gly120, Ala121)	–	–
281	12/16/09	Chuvashiya	421	629	5718	0.12	0.25	0.002	0.002	4	0.06	wt (Ser91, Asp95)	wt (Ser87, Glu91)	Met57	ins345Asp	Pro421	wt	wt	wt	wt	wt (Gly120, Ala121)	–	–
282	12/16/22	Chuvashiya	8462	6	14834	0.015	0.25	0.002	0.008	32	0.5	wt (Ser91, Asp95)	wt (Ser87, Glu91)	wt (Val57)	wt	wt (Leu421)	wt	wt	wt	wt	Asn120, Asp121	–	–
283	12/16/08	Chuvashiya	3540	399	5926	0.06	1	0.002	0.008	16	0.06	wt (Ser91, Asp95)	wt (Ser87, Glu91)	Met57	ins345Asp	wt (Leu421)	wt	wt	wt	wt	wt (Gly120, Ala121)	–	–
284	12/16/30	Chuvashiya	2092	4	3441	0.25	0.25	0.004	8	32	0.03	Phe91, Gly95	Arg87, Glu91	Met57	ins345Asp	Pro421	wt	wt	wt	-35delA	Asn120, Asp121	–	–
285	12/16/23	Chuvashiya	738	6	5714	0.015	0.25	0.002	0.002	8	0.12	wt (Ser91, Asp95)	wt (Ser87, Glu91)	wt (Val57)	wt	wt (Leu421)	wt	wt	wt	wt	wt (Gly120, Ala121)	–	–
286	12/16/24	Chuvashiya	5912	29	14617	0.015	0.25	0.002	1	8	0.03	Phe91, Asp95	wt (Ser87, Glu91)	Met57	ins345Asp	Pro421	wt	wt	wt	wt	wt (Gly120, Ala121)	–	–
287	12/16/25	Chuvashiya	8485	6	14628	0.015	0.25	0.002	0.002	16	0.12	wt (Ser91, Asp95)	wt (Ser87, Glu91)	wt (Val57)	wt	wt (Leu421)	wt	wt	wt	wt	wt (Gly120, Ala121)	–	–
288	12/16/26	Chuvashiya	8482	6	14627	0.015	0.25	0.002	0.002	16	0.25	wt (Ser91, Asp95)	wt (Ser87, Glu91)	wt (Val57)	wt	wt (Leu421)	wt	wt	wt	wt	wt (Gly120, Ala121)	–	–
289	12/15/08	Chuvashiya	1257	6	1993	0.015	0.5	0.002	0.004	16	0.25	wt (Ser91, Asp95)	wt (Ser87, Glu91)	wt (Val57)	wt	wt (Leu421)	wt	wt	wt	wt	wt (Gly120, Ala121)	–	–
290	12/15/10	Chuvashiya	1257	6	1993	0.015	0.06	0.002	0.002	8	0.12	wt (Ser91, Asp95)	wt (Ser87, Glu91)	wt (Val57)	wt	wt (Leu421)	wt	wt	wt	wt	wt (Gly120, Ala121)	–	–
291	12/15/03	Chuvashiya	738	6	5714	0.015	0.12	0.008	0.008	32	0.5	wt (Ser91, Asp95)	wt (Ser87, Glu91)	wt (Val57)	ins345Asp	wt (Leu421)	wt	wt	wt	wt	wt (Gly120, Ala121)	–	–
292	12/15/06	Chuvashiya	37	27	807	0.12	0.5	0.008	0.008	16	0.12	wt (Ser91, Asp95)	wt (Ser87, Glu91)	wt (Val57)	ins345Asp	wt (Leu421)	wt	wt	wt	wt	wt (Gly120, Ala121)	–	–
293	12/15/02	Chuvashiya	37	27	807	0.12	0.12	0.008	0.008	32	0.125	wt (Ser91, Asp95)	wt (Ser87, Glu91)	wt (Val57)	ins345Asp	wt (Leu421)	wt	wt	wt	wt	wt (Gly120, Ala121)	–	–
294	12/15/04	Chuvashiya	37	27	807	0.06	0.06	0.004	0.004	8	0.03	wt (Ser91, Asp95)	wt (Ser87, Glu91)	wt (Val57)	ins345Asp	wt (Leu421)	wt	wt	wt	wt	wt (Gly120, Ala121)	–	–
295	12/15/01	Chuvashiya	3547	27	5941	0.12	0.25	0.008	0.008	32	0.25	wt (Ser91, Asp95)	wt (Ser87, Glu91)	wt (Val57)	ins345Asp	wt (Leu421)	wt	wt	wt	wt	wt (Gly120, Ala121)	–	–
296	12/15/05	Chuvashiya	7591	2257	13060	0.25	0.5	0.002	8	16	0.03	Phe91, Gly95	Arg87, Glu91	Met57	ins345Asp	Pro421	wt	wt	wt	-35delA	wt (Gly120, Ala121)	–	–
297	12/15/07	Chuvashiya	5675	27	9570	0.06	0.06	0.002	0.004	16	0.12	wt (Ser91, Asp95)	wt (Ser87, Glu91)	wt (Val57)	ins345Asp	wt (Leu421)	wt	wt	wt	wt	wt (Gly120, Ala121)	–	–
298	12/15/09	Chuvashiya	5675	27	9570	0.015	0.06	0.002	0.002	16	0.25	wt (Ser91, Asp95)	wt (Ser87, Glu91)	wt (Val57)	wt	wt (Leu421)	wt	wt	wt	wt	wt (Gly120, Ala121)	–	–
299	08/17/01	Irkutsk	2037	27	3369	0.25	0.5	0.004	8	16	0.25	Phe91, Gly95	Arg 87, Glu91	wt (Val57)	ins345Asp	Pro421	wt	wt	wt	-35delA	wt (Gly120, Ala121)	–	–
300	08/17/01	Irkutsk	2037	27	3369	0.25	0.5	0.004	8	16	0.25	Phe91, Gly95	Arg 87, Glu91	Met57	ins345Asp	Pro421	wt	wt	wt	-35delA	wt (Gly120, Ala121)	–	–
301	20/17/07	Kaluga	9157	137	15644	32	64	0.015	8	16	0.06	Phe91, Asn 95	Asn87, Lys91	Met57	ins345Asp	wt (Leu421)	wt	wt	wt	wt	wt (Gly120, Ala121)	tetM	blaTEM (African)
302	20/17/08	Kaluga	9157	137	15644	32	64	0.004	8	16	0.06	Phe91, Asn 95	Asn87, Lys91	Met57	ins345Asp	Pro421	wt	wt	wt	wt	wt (Gly120, Ala121)	tetM	blaTEM (African)
303	20/17/09	Kaluga	9157	137	15644	32	64	0.004	8	16	0.06	Thr91, Gly95	wt (Ser87, Glu91)	Met57	ins345Asp	wt (Leu421)	wt	wt	wt	wt	wt (Gly120, Ala121)	tetM	blaTEM (African)
304	20/17/01	Kaluga	3540	175	15620	0.5	0.5	0.002	4	32	0.06	Phe91, Asn 95	Arg87, Glu91	Met57	ins345Asp	Pro421	wt	wt	wt	-35delA	wt (Gly120, Ala121)	–	–
305	20/17/03	Kaluga	3540	175	15620	0.06	0.5	0.002	0.002	32	0.03	Thr91, Gly95	wt (Ser87, Glu91)	Met57	ins345Asp	wt (Leu421)	wt	wt	wt	wt	wt (Gly120, Ala121)	–	–
306	20/17/05	Kaluga	9157	137	15644	32	1	0.125	16	32	0.12	Phe91, Asn 95	Asn87, Lys91	Met57	ins345Asp	Pro421	wt	wt	wt	wt	wt (Gly120, Ala121)	–	blaTEM (African)
307	20/17/17	Kaluga	421	2390	14020	0.25	0.5	0.002	0.004	16	0.06	Thr91, Gly95	wt (Ser87, Glu91)	Met57	ins345Asp	wt (Leu421)	wt	wt	wt	wt	wt (Gly120, Ala121)	–	–
308	20/17/10	Kaluga	421	2390	14020	0.12	0.5	0.002	0.004	16	0.06	Thr91, Gly95	wt (Ser87, Glu91)	Met57	ins345Asp	wt (Leu421)	wt	wt	wt	wt	wt (Gly120, Ala121)	–	–
309	20/17/11	Kaluga	5680	27	9576	0.06	0.5	0.002	0.004	16	0.06	Thr91, Gly95	wt (Ser87, Glu91)	wt (Val57)	ins345Asp	wt (Leu421)	wt	wt	wt	wt	wt (Gly120, Ala121)	–	–
310	20/17/14	Kaluga	5680	27	9576	0.12	0.06	0.004	0.004	32	0.06	Thr91, Gly95	wt (Ser87, Glu91)	wt (Val57)	ins345Asp	wt (Leu421)	wt	wt	wt	wt	wt (Gly120, Ala121)	–	–
311	20/17/20	Kaluga	9408	27	16173	32	1	0.03	64	8	0.12	Phe91, Asn 95	Arg87, Glu91	Met57	ins345Asp	Pro421	wt	wt	wt	-35delA	Asn120, Asp121	–	blaTEM (Toronto/Rio)
312	20/17/21	Kaluga	406	118	9574	0.03	1	0.002	0.004	32	0.06	Thr91, Gly95	wt (Ser87, Glu91)	wt (Val57)	wt	wt (Leu421)	wt	wt	wt	wt	wt (Gly120, Ala121)	–	–
313	20/17/15	Kaluga	37	27	807	0.03	0.5	0.004	0.008	4	0.12	Thr91, Gly95	wt (Ser87, Glu91)	wt (Val57)	ins345Asp	wt (Leu421)	wt	wt	wt	wt	wt (Gly120, Ala121)	–	–
314	20/17/16	Kaluga	1483	2598	16175	2	1	0.002	8	16	0.12	Phe91, Gly95	Arg 87, Glu91	Met57	ins345Asp	Pro421	wt	wt	wt	wt	Lys 120, Gly121	–	–
315	20/16/10	Kaluga	37	27	807	0.06	0.25	0.008	0.008	16	0.12	wt (Ser91, Asp95)	wt (Ser87, Glu91)	wt (Val57)	ins345Asp	wt (Leu421)	wt	wt	wt	wt	wt (Gly120, Ala121)	–	–
316	20/16/14	Kaluga	1808	29	2992	0.015	1	0.002	0.002	16	0.12	wt (Ser91, Asp95)	wt (Ser87, Glu91)	Met57	ins345Asp	wt (Leu421)	wt	wt	wt	wt	wt (Gly120, Ala121)	–	–
317	20/16/02	Kaluga	7731	1199	13316	0.5	1	0.015	8	16	0.25	wt (Ser91, Asp95)	wt (Ser87, Glu91)	wt (Val57)	ins345Asp	Pro421	wt	wt	wt	wt	wt (Gly120, Ala121)	–	–
318	20/16/05	Kaluga	37	27	807	0.12	0.5	0.004	0.004	16	0.25	wt (Ser91, Asp95)	wt (Ser87, Glu91)	wt (Val57)	ins345Asp	wt (Leu421)	wt	wt	wt	wt	wt (Gly120, Ala121)	–	–
319	20/16/11	Kaluga	406	118	9574	0.015	0.25	0.002	0.008	16	0.06	wt (Ser91, Asp95)	wt (Ser87, Glu91)	wt (Val57)	wt	wt (Leu421)	wt	wt	wt	wt	wt (Gly120, Ala121)	–	–
320	20/16/13	Kaluga	7731	1199	13316	0.03	0.12	0.002	0.002	8	0.06	wt (Ser91, Asp95)	wt (Ser87, Glu91)	wt (Val57)	ins345Asp	Pro421	wt	wt	wt	wt	wt (Gly120, Ala121)	–	–
321	20/16/06	Kaluga	7731	1199	13316	0.06	0.25	0.008	0.002	8	0.03	wt (Ser91, Asp95)	wt (Ser87, Glu91)	wt (Val57)	ins345Asp	Pro421	wt	wt	wt	wt	wt (Gly120, Ala121)	–	–
322	20/16/07	Kaluga	8086	2385	14023	0.12	0.06	0.002	0.002	16	0.06	wt (Ser91, Asp95)	wt (Ser87, Glu91)	wt (Val57)	ins345Asp	Pro421	wt	wt	wt	wt	wt (Gly120, Ala121)	–	–
323	20/16/08	Kaluga	7731	1199	13316	0.015	0.12	0.002	0.002	8	0.03	wt (Ser91, Asp95)	wt (Ser87, Glu91)	wt (Val57)	ins345Asp	Pro421	wt	wt	wt	wt	wt (Gly120, Ala121)	–	–
324	20/16/04	Kaluga	3544	118	14027	0.015	0.06	0.002	0.002	16	0.06	wt (Ser91, Asp95)	wt (Ser87, Glu91)	wt (Val57)	wt	wt (Leu421)	wt	wt	wt	wt	wt (Gly120, Ala121)	–	–
325	20/16/09	Kaluga	3544	118	14027	0.015	0.5	0.002	0.002	32	0.06	wt (Ser91, Asp95)	wt (Ser87, Glu91)	wt (Val57)	wt	wt (Leu421)	wt	wt	wt	wt	wt (Gly120, Ala121)	–	–
326	20/16/03	Kaluga	7731	1199	13316	0.12	0.12	0.002	0.002	8	0.015	wt (Ser91, Asp95)	wt (Ser87, Glu91)	wt (Val57)	ins345Asp	Pro421	wt	wt	wt	wt	wt (Gly120, Ala121)	–	–
327	20/16/12	Kaluga	406	118	9574	0.03	0.5	0.03	0.008	64	0.12	wt (Ser91, Asp95)	wt (Ser87, Glu91)	wt (Val57)	wt	wt (Leu421)	wt	wt	wt	wt	wt (Gly120, Ala121)	–	–
328	20/16/19	Kaluga	1614	2388	14025	0.015	0.5	0.002	0.004	32	0.12	wt (Ser91, Asp95)	wt (Ser87, Glu91)	wt (Val57)	wt	wt (Leu421)	wt	wt	wt	wt	wt (Gly120, Ala121)	–	–
329	20/16/16	Kaluga	1614	2388	14025	0.015	0.25	0.002	0.004	32	0.12	wt (Ser91, Asp95)	wt (Ser87, Glu91)	wt (Val57)	wt	wt (Leu421)	wt	wt	wt	wt	wt (Gly120, Ala121)	–	–
330	20/16/17	Kaluga	1614	2387	14026	0.015	0.25	0.002	0.004	32	0.12	wt (Ser91, Asp95)	wt (Ser87, Glu91)	wt (Val57)	wt	wt (Leu421)	wt	wt	wt	wt	wt (Gly120, Ala121)	–	–
331	20/16/18	Kaluga	7074	4	12096	16	32	0.004	8	32	0.12	wt (Ser91, Asp95)	Asn 87, Lys91	Met57	ins345Asp	Pro421	wt	wt	wt	wt	wt (Gly120, Ala121)	tetM	blaTEM (African)
332	20/16/15	Kaluga	5675	27	9570	0.06	0.12	0.008	0.004	16	0.12	wt (Ser91, Asp95)	wt (Ser87, Glu91)	wt (Val57)	ins345Asp	wt (Leu421)	wt	wt	wt	wt	wt (Gly120, Ala121)	–	–
333	20/16/20	Kaluga	5675	27	9570	0.06	0.12	0.008	0.004	16	0.12	wt (Ser91, Asp95)	wt (Ser87, Glu91)	wt (Val57)	ins345Asp	wt (Leu421)	wt	wt	wt	wt	wt (Gly120, Ala121)	–	–
334	20/16/21	Kaluga	406	118	9574	0.015	0.12	0.002	0.002	16	0.06	wt (Ser91, Asp95)	wt (Ser87, Glu91)	wt (Val57)	wt	wt (Leu421)	wt	wt	wt	wt	wt (Gly120, Ala121)	–	–
335	20/16/33	Kaluga	406	118	9574	0.015	0.12	0.002	0.002	16	0.06	wt (Ser91, Asp95)	wt (Ser87, Glu91)	wt (Val57)	wt	wt (Leu421)	wt	wt	wt	wt	wt (Gly120, Ala121)	–	–
336	20/16/23	Kaluga	8477	2448	14607	0.015	1	0.002	0.004	16	0.12	wt (Ser91, Asp95)	wt (Ser87, Glu91)	wt (Val57)	wt	wt (Leu421)	wt	wt	wt	wt	wt (Gly120, Ala121)	–	–
337	20/16/24	Kaluga	1614	2388	14025	0.015	0.5	0.002	0.004	16	0.12	wt (Ser91, Asp95)	wt (Ser87, Glu91)	wt (Val57)	wt	wt (Leu421)	wt	wt	wt	wt	wt (Gly120, Ala121)	–	–
338	20/16/25	Kaluga	5680	27	9576	0.03	0.06	0.008	0.002	16	0.12	wt (Ser91, Asp95)	wt (Ser87, Glu91)	wt (Val57)	ins345Asp	wt (Leu421)	wt	wt	wt	wt	wt (Gly120, Ala121)	–	–
339	20/16/26	Kaluga	1614	2388	14025	0.015	0.25	0.002	0.004	32	0.25	wt (Ser91, Asp95)	wt (Ser87, Glu91)	wt (Val57)	wt	wt (Leu421)	wt	wt	wt	wt	wt (Gly120, Ala121)	–	–
340	20/16/27	Kaluga	8481	1218	14827	0.015	0.12	0.002	0.004	16	0.06	wt (Ser91, Asp95)	wt (Ser87, Glu91)	wt (Val57)	wt	wt (Leu421)	wt	wt	wt	wt	wt (Gly120, Ala121)	–	–
341	20/16/28	Kaluga	266	160	5590	0.015	0.12	0.002	0.004	16	0.06	wt (Ser91, Asp95)	wt (Ser87, Glu91)	wt (Val57)	wt	wt (Leu421)	wt	wt	wt	wt	wt (Gly120, Ala121)	–	–
342	20/16/32	Kaluga	406	118	9574	0.015	0.12	0.002	0.004	16	0.06	wt (Ser91, Asp95)	wt (Ser87, Glu91)	wt (Val57)	wt	wt (Leu421)	wt	wt	wt	wt	wt (Gly120, Ala121)	–	–
343	20/16/30	Kaluga	8493	29	14608	0.015	0.25	0.002	0.004	16	0.25	wt (Ser91, Asp95)	wt (Ser87, Glu91)	Met57	ins345Asp	wt (Leu421)	wt	wt	wt	wt	wt (Gly120, Ala121)	–	–
344	20/16/22	Kaluga	738	118	1152	0.015	0.12	0.002	0.002	16	0.06	wt (Ser91, Asp95)	wt (Ser87, Glu91)	wt (Val57)	wt	wt (Leu421)	wt	wt	wt	wt	wt (Gly120, Ala121)	–	–
345	20/16/31	Kaluga	1614	2388	14025	0.06	0.25	0.002	0.002	8	0.12	wt (Ser91, Asp95)	wt (Ser87, Glu91)	wt (Val57)	wt	wt (Leu421)	wt	wt	wt	wt	wt (Gly120, Ala121)	–	–
346	20/16/29	Kaluga	406	118	9574	0.015	0.12	0.002	0.004	16	0.06	wt (Ser91, Asp95)	wt (Ser87, Glu91)	wt (Val57)	wt	wt (Leu421)	wt	wt	wt	wt	wt (Gly120, Ala121)	–	–
347	20/16/01	Kaluga	7731	2389	14024	0.06	0.25	0.002	0.008	16	0.03	wt (Ser91, Asp95)	wt (Ser87, Glu91)	wt (Val57)	ins345Asp	wt (Leu421)	wt	wt	wt	wt	wt (Gly120, Ala121)	–	–
348	20/15/06	Kaluga	7373	230	12599	0.015	0.06	0.002	0.004	4	0.03	wt (Ser91, Asp95)	wt (Ser87, Glu91)	wt (Val57)	wt	wt (Leu421)	wt	wt	wt	wt	wt (Gly120, Ala121)	–	–
349	20/15/03	Kaluga	7374	118	12600	0.015	0.03	0.002	0.002	8	0.002	wt (Ser91, Asp95)	wt (Ser87, Glu91)	wt (Val57)	wt	wt (Leu421)	wt	wt	wt	wt	wt (Gly120, Ala121)	–	–
350	20/15/04	Kaluga	908	110	1407	0.5	2	0.016	16	32	0.03	Phe91, Gly95	Arg87, Glu91	Met57	ins345Asp	Pro421	wt	wt	wt	-35delA	Lys 120, Asn 121	–	–
351	20/15/01	Kaluga	5680	27	9576	0.12	0.12	0.008	0.004	4	0.12	wt (Ser91, Asp95)	wt (Ser87, Glu91)	wt (Val57)	ins345Asp	wt (Leu421)	wt	wt	wt	wt	wt (Gly120, Ala121)	–	–
352	20/15/05	Kaluga	6628	291	11335	0.06	0.12	0.002	0.002	16	0.002	wt (Ser91, Asp95)	wt (Ser87, Glu91)	wt (Val57)	ins345Asp	wt (Leu421)	wt	wt	wt	wt	wt (Gly120, Ala121)	–	–
353	20/15/02	Kaluga	7375	4	12601	0.5	2	0.008	4	32	0.03	Phe91, Gly95	Arg87, Glu91	Met57	ins345Asp	Pro421	wt	wt	wt	-35delA	Asn120, Asp121	–	–
354	09/17/01	Kazan	90	75	1751	0.5	32	0.008	4	16	0.12	Phe91, Asn95	Arg87, Glu91	Met57	ins345Asp	wt (Leu421)	wt	wt	wt	-35delA	Asp120, Gly121	tetM	–
355	09/17/06	Kazan	1489	563	2400	0.06	2	0.008	64	16	0.25	Phe91, Asn 95	Ser87, Gly91	Met57	ins345Asp	Pro421	wt	wt	wt	-35delA	Asn120, Asp121	–	–
356	09/17/18	Kazan	28	4	292	0.12	0.5	0.002	0.004	16	0.03	Thr91, Gly95	wt (Ser87, Glu91)	Met57	ins345Asp	wt (Leu421)	wt	wt	wt	wt	Gly120, Ser121	–	–
357	09/17/19	Kazan	28	4	292	0.25	0.5	0.002	0.004	16	0.06	Thr91, Gly95	wt (Ser87, Glu91)	Met57	ins345Asp	wt (Leu421)	wt	wt	wt	wt	Gly120, Ser121	–	–
358	09/17/21	Kazan	28	4	292	0.5	0.5	0.002	0.008	16	0.06	Thr91, Gly95	wt (Ser87, Glu91)	Met57	wt	wt (Leu421)	wt	wt	wt	wt	Gly120, Ser121	–	–
359	17/17/01	Kazan	9402	27	16177	0.06	0.5	0.002	0.008	16	0.12	Thr91, Gly95	wt (Ser87, Glu91)	wt (Val57)	wt	Pro421	wt	wt	wt	wt	wt (Gly120, Ala121)	–	–
360	09/16/06	Kazan	266	2384	14039	0.03	1	0.002	0.004	16	0.03	wt (Ser91, Asp95)	wt (Ser87, Glu91)	wt (Val57)	wt	wt (Leu421)	wt	wt	wt	wt	wt (Gly120, Ala121)	–	–
361	09/16/04	Kazan	1674	118	2678	0.015	0.5	0.004	0.004	32	0.12	wt (Ser91, Asp95)	wt (Ser87, Glu91)	wt (Val57)	wt	wt (Leu421)	wt	wt	wt	wt	wt (Gly120, Ala121)	–	–
362	09/16/03	Kazan	14	35	588	0.06	0.25	0.03	0.002	8	0.03	wt (Ser91, Asp95)	wt (Ser87, Glu91)	Met57	ins345Asp	wt (Leu421)	wt	wt	wt	wt	Asn120, Asp121	–	–
363	09/16/01	Kazan	1754	4	9834	0.25	1	0.004	0.004	16	0.12	wt (Ser91, Asp95)	Arg87, Glu91	Met57	ins345Asp	Pro421	wt	wt	wt	wt	Asp120, Ala121	–	–
364	09/16/02	Kazan	8474	118	14609	0.03	0.25	0.002	0.004	32	0.12	wt (Ser91, Asp95)	wt (Ser87, Glu91)	wt (Val57)	wt	wt (Leu421)	wt	wt	wt	wt	wt (Gly120, Ala121)	–	–
365	09/16/05	Kazan	8487	6	14610	0.015	0.25	0.002	0.004	8	0.25	wt (Ser91, Asp95)	wt (Ser87, Glu91)	wt (Val57)	wt	wt (Leu421)	wt	wt	wt	wt	wt (Gly120, Ala121)	–	–
366	09/16/07	Kazan	1808	2003	14611	0.03	0.5	0.002	0.008	16	0.25	wt (Ser91, Asp95)	wt (Ser87, Glu91)	Met57	ins345Asp	wt (Leu421)	wt	wt	wt	wt	wt (Gly120, Ala121)	–	–
367	09/16/08	Kazan	3544	6	14612	0.06	0.25	0.015	0.008	16	0.12	wt (Ser91, Asp95)	wt (Ser87, Glu91)	wt (Val57)	wt	wt (Leu421)	wt	wt	wt	wt	wt (Gly120, Ala121)	–	–
368	09/15/06	Kazan	1257	6	1993	0.015	0.5	0.002	0.002	32	0.03	wt (Ser91, Asp95)	wt (Ser87, Glu91)	wt (Val57)	wt	wt (Leu421)	wt	wt	wt	wt	wt (Gly120, Ala121)	–	–
369	09/15/03	Kazan	266	32	12445	1	1	0.008	8	32	0.015	Phe91, Gly95	Arg87, Glu91	Met57	ins345Asp	Pro421	wt	wt	wt	-35delA	wt (Gly120, Ala121)	–	–
370	09/15/04	Kazan	266	32	12445	0.25	2	0.008	16	32	0.015	Phe91, Gly95	Arg87, Glu91	Met57	ins345Asp	Pro421	wt	wt	wt	wt	wt (Gly120, Ala121)	–	–
371	09/15/01	Kazan	7288	393	12448	0.015	16	0.002	0.008	32	0.004	wt (Ser91, Asp95)	wt (Ser87, Glu91)	wt (Val57)	wt	wt (Leu421)	wt	wt	wt	wt	wt (Gly120, Ala121)	tetM	–
372	09/15/02	Kazan	7288	393	12448	0.5	8	0.008	4	32	0.03	Phe91, Gly95	wt (Ser87, Glu91)	wt (Val57)	wt	wt (Leu421)	wt	wt	wt	wt	wt (Gly120, Ala121)	tetM	–
373	09/15/05	Kazan	7330	25	12540	1	2	0.015	0.015	32	0.06	wt (Ser91, Asp95)	Arg87, Glu91	wt (Val57)	ins345Asp	Pro421	wt	wt	wt	-35delA	Lys 120, Asn 121	–	–
374	00/17/01	Moscow	5136	18	16169	1	0.5	0.002	4	32	0.25	Phe91, Asn95	Arg 87, Glu91	Met57	ins345Asp	Pro421	wt	wt	wt	wt	Gly120, Gly121	–	–
375	00/17/02	Moscow	997	33	7848	16	32	0.03	16	32	0.25	Phe91, Ala95	Asn87, Gly91	Met57	ins345Asp	Pro421	wt	wt	wt	wt	Lys 120, Gly121	tetM	blaTEM (African)
376	00/16/01	Moscow	1808	29	2992	0.12	2	0.002	0.008	32	0.5	wt (Ser91, Asp95)	wt (Ser87, Glu91)	Met57	ins345Asp	wt (Leu421)	wt	wt	wt	wt	wt (Gly120, Ala121)	–	–
377	00/16/02	Moscow	1893	137	3109	32	0.5	0.002	4	16	0.03	wt (Ser91, Asp95)	wt (Ser87, Glu91)	wt (Val57)	ins345Asp	wt (Leu421)	wt	wt	wt	wt	Lys 120, Gly121	–	blaTEM (African)
378	00/16/03	Moscow	1893	137	3109	8	0.25	0.002	4	8	0.03	Phe91, Asp95	Asn 87, Glu91	Met57	ins345Asp	Pro421	wt	wt	wt	wt	Lys 120, Gly121	–	blaTEM (African)
379	21/17/01	Novosibirsk	9410	187	16180	2	4	0.008	64	32	0.5	Phe91, Asn 95	Arg 87, Glu91	Met57	wt	Pro421	wt	wt	wt	-35delA	Asn120, Asp121	–	–
380	21/17/04	Novosibirsk	90	75	1751	1	16	0.002	2	16	0.06	Phe91, Asn 95	wt (Ser87, Glu91)	Met57	ins345Asp	Pro421	wt	wt	wt	wt	Asp120, Gly121	tetM	–
381	21/17/10	Novosibirsk	90	75	1751	1	16	0.002	4	8	0.06	Phe91, Asn 95	wt (Ser87, Glu91)	Met57	ins345Asp	Pro421	wt	wt	wt	wt	Asp120, Gly121	tetM	–
382	21/17/12	Novosibirsk	1042	75	4730	2	2	0.015	32	16	0.12	Phe91, Asn 95	wt (Ser87, Glu91)	Met57	ins345Asp	Pro421	wt	wt	wt	-35delA	Asn120, Asp121	–	–
383	21/17/13	Novosibirsk	1042	75	4730	2	4	0.03	64	16	0.5	Phe91, Asn 95	wt (Ser87, Glu91)	Met57	ins345Asp	wt (Leu421)	wt	wt	wt	-35delA	Asn120, Asp 121	–	–
384	21/17/16	Novosibirsk	90	75	1751	0.5	16	0.002	2	16	0.12	Phe91, Asn 95	wt (Ser87, Glu91)	Met57	ins345Asp	wt (Leu421)	wt	wt	wt	wt	Asp120, Gly121	tetM	–
385	21/17/03	Novosibirsk	9197	118	15748	32	64	0.06	32	32	0.25	Phe91, Asn95	Asn87, Gly91	Met57	wt	Pro421	wt	wt	wt	wt	wt (Gly120, Ala121)	tetM	blaTEM (African)
386	21/17/06	Novosibirsk	9197	118	15748	1	0.5	0.004	8	32	0.12	Phe91, Asn 95	Arg87, Glu91	Met57	ins345Asp	Pro421	wt	wt	wt	-35delA	wt (Gly120, Ala121)	–	–
387	21/17/07	Novosibirsk	9408	75	16178	2	0.5	0.03	64	8	0.25	Phe91, Asn 95	wt (Ser87, Glu91)	Met57	ins345Asp	Pro421	wt	wt	wt	-35delA	Asn120, Asp121	–	–
388	21/17/08	Novosibirsk	9408	75	16178	1	0.5	0.03	64	8	0.25	Phe91, Asn 95	wt (Ser87, Glu91)	Met57	ins345Asp	Pro421	wt	wt	wt	-35delA	Asn120, Asp121	–	–
389	21/17/17	Novosibirsk	9408	75	16178	1	1	0.008	64	16	0.25	Phe91, Asn95	wt (Ser87, Glu91)	Met57	ins345Asp	Pro421	wt	wt	wt	-35delA	Asn120, Asp121	–	–
390	21/17/09	Novosibirsk	9408	75	16178	1	0.5	0.008	64	8	0.12	Phe91, Asn95	wt (Ser87, Glu91)	Met57	ins345Asp	Pro421	wt	wt	wt	-35delA	Asn120, Asp121	–	–
391	21/17/11	Novosibirsk	1042	75	4730	1	1	0.008	64	16	0.25	Phe91, Asn95	wt (Ser87, Glu91)	Met57	ins345Asp	Pro421	wt	wt	wt	-35delA	Asn120, Asp121	–	–
392	21/17/14	Novosibirsk	9409	75	16181	2	0.5	0.03	32	32	0.25	Phe91, Asn95	wt (Ser87, Glu91)	Met57	ins345Asp	Pro421	wt	wt	wt	-35delA	Asn120, Asp121	–	–
393	21/17/02	Novosibirsk	1042	75	4730	2	0.5	0.015	64	16	0.25	Phe91, Asn 95	wt (Ser87, Glu91)	wt (Val57)	ins345Asp	Pro421	wt	wt	wt	-35delA	Asn120, Asp121	–	–
394	21/17/15	Novosibirsk	908	29	3935	0.5	0.5	0.002	0.06	16	0.5	Thr91, Gly95	wt (Ser87, Glu91)	Met57	wt	wt (Leu421)	wt	wt	wt	wt	Lys120, Asn121	–	–
395	21/17/18	Novosibirsk	5795	75	16179	1	2	0.06	64	16	0.25	Phe91, Asn 95	wt (Ser87, Glu91)	Met57	ins345Asp	Pro421	wt	wt	wt	-35delA	Asn120, Asp121	–	–
396	21/17/19	Novosibirsk	5795	75	16179	1	1	0.03	32	16	0.25	Phe91, Asn 95	wt (Ser87, Glu91)	Met57	ins345Asp	Pro421	wt	wt	wt	-35delA	Asn120, Asp121	–	–
397	21/17/20	Novosibirsk	5795	75	16179	1	1	0.03	32	16	0.25	Phe91, Asn 95	wt (Ser87, Glu91)	Met57	wt	Pro421	wt	wt	wt	-35delA	Asn120, Asp121	–	–
398	21/17/21	Novosibirsk	5795	75	16179	1	1	0.015	16	16	0.25	Phe91, Asn95	wt (Ser87, Glu91)	Met57	wt	Pro421	wt	wt	wt	-35delA	Asn120, Asp121	–	–
399	21/17/22	Novosibirsk	5795	75	16179	0.5	1	0.015	16	16	0.25	Phe91, Asn95	wt (Ser87, Glu91)	Met57	ins345Asp	Pro421	wt	wt	wt	-35delA	Asn120, Asp121	–	–
400	21/17/23	Novosibirsk	90	75	1751	0.06	4	0.002	4	16	0.03	Phe91, Asn95	wt (Ser87, Glu91)	Met57	ins345Asp	Pro421	wt	wt	wt	wt	Asp120, Gly121	–	–
401	21/16/03	Novosibirsk	8084	75	14011	0.5	2	0.015	64	16	0.25	Phe91, Asn95	Ile87, Glu91	Met57	ins345Asp	Pro421	wt	wt	wt	-35delA	Lys 120, Gly121	–	–
402	21/16/01	Novosibirsk	8083	75	14012	0.06	32	0.004	4	8	0.06	Phe91, Asn95	wt (Ser87, Glu91)	Met57	ins345Asp	Pro421	wt	wt	wt	wt	wt (Gly120, Ala121)	tetM	–
403	21/16/02	Novosibirsk	8084	75	14011	0.5	4	0.015	64	8	0.25	Phe91, Asn95	wt (Ser87, Glu91)	Met57	ins345Asp	Pro421	wt	wt	wt	-35delA	Lys 120, Gly121	–	–
404	21/16/04	Novosibirsk	8488	4	14614	0.5	2	0.004	32	16	0.25	Phe91, Asn95	Arg87, Glu91	Met57	ins345Asp	Pro421	wt	wt	wt	-35delA	Lys 120, Gly121	–	–
405	21/16/05	Novosibirsk	1042	75	4730	0.5	2	0.03	32	16	0.25	Phe91, Asn95	wt (Ser87, Glu91)	Met57	ins345Asp	Pro421	wt	wt	wt	-35delA	Asn120, Asp121	–	–
406	21/16/06	Novosibirsk	8611	29	14828	0.12	2	0.002	0.015	32	1	Phe91, Asp95	wt (Ser87, Glu91)	Met57	ins345Asp	wt (Leu421)	wt	wt	wt	-35delA	Lys120, Asn121	–	–
407	21/16/07	Novosibirsk	8495	6	14615	0.06	0.06	0.002	1	16	0.25	Phe91, Asn95	Arg87, Glu91	Met57	ins345Asp	Pro421	wt	wt	wt	wt	Asp120, Gly121	–	–
408	21/16/08	Novosibirsk	8489	25	14616	0.12	4	0.004	0.008	16	0.12	Phe91, Asp95	wt (Ser87, Glu91)	Met57	ins345Asp	Pro421	wt	wt	wt	-35delA	Asn120, Asp121	–	–
409	21/16/09	Novosibirsk	4953	29	8241	0.06	4	0.002	0.008	8	1	wt (Ser91, Asp95)	wt (Ser87, Glu91)	Met57	ins345Asp	wt (Leu421)	wt	wt	wt	wt	Lys120, Asn121	tetM	–
410	21/16/10	Novosibirsk	8613	1411	14829	0.06	0.25	0.002	0.004	8	0.12	wt (Ser91, Asp95)	wt (Ser87, Glu91)	wt (Val57)	ins345Asp	Pro421	wt	wt	wt	wt	wt (Gly120, Ala121)	–	–
411	21/15/02	Novosibirsk	7326	4	12532	0.25	0.5	0.002	8	16	0.06	Phe91, Gly95	Arg87, Glu91	Met57	ins345Asp	Pro421	wt	wt	wt	wt	wt (Gly120, Ala121)	–	–
412	21/15/04	Novosibirsk	1257	6	1993	0.015	0.06	0.002	0.004	64	1	wt (Ser91, Asp95)	wt (Ser87, Glu91)	Met57	ins345Asp	wt (Leu421)	wt	wt	wt	wt	wt (Gly120, Ala121)	–	–
413	21/15/01	Novosibirsk	90	72	12528	0.25	1	0.004	16	32	0.06	Phe91, Asn95	Ser87, Gly 91	Met57	ins345Asp	Pro421	wt	wt	wt	wt	Asp120, Gly121	–	–
414	21/15/05	Novosibirsk	7587	75	13056	0.5	1	0.008	8	16	0.25	wt (Ser91, Asp95)	Ile 87, Glu91	wt (Val57)	ins345Asp	Pro421	wt	wt	wt	-35delA	Asp120, Gly121	–	–
415	21/15/07	Novosibirsk	7587	75	13056	0.5	1	0.004	8	16	0.25	Phe91, Asp95	wt (Ser87, Glu91)	Met57	ins345Asp	Pro421	wt	wt	wt	-35delA	Asp120, Gly121	–	–
416	21/15/06	Novosibirsk	7588	75	13057	0.5	1	0.008	8	16	0.25	Phe91, Asp95	wt (Ser87, Glu91)	Met57	ins345Asp	Pro421	wt	wt	wt	-35delA	Asp120, Gly121	–	–
417	21/15/03	Novosibirsk	4	25	2694	0.5	2	0.008	0.5	32	0.5	wt (Ser91, Asp95)	wt (Ser87, Glu91)	wt (Val57)	ins345Asp	Pro421	wt	wt	wt	wt	Lys 120, Asp121	–	–
418	19/17/04	Omsk	2020	6	12446	1	2	0.032	64	32	1	Phe91, Asn 95	Arg87, Glu91	Met57	ins345Asp	Pro421	wt	wt	wt	-35delA	Lys120, Gly121	–	–
419	19/17/11	Omsk	9145	4	15624	0.5	2	0.008	16	16	0.25	Phe91, Asn 95	Arg 87, Glu91	wt (Val57)	ins345Asp	wt (Leu421)	wt	wt	wt	-35delA	Asp120, Ala121	–	–
420	19/17/09	Omsk	738	6	5714	0.12	0.5	0.002	4	32	0.06	Phe91, Asn95	Arg 87, Glu91	Met57	ins345Asp	Pro421	wt	wt	wt	wt	wt (Gly120, Ala121)	–	–
421	19/17/10	Omsk	7289	6	13055	0.25	1	0.002	16	16	0.25	Phe91, Asn95	Arg87, Glu91	Met57	ins345Asp	Pro421	wt	wt	wt	wt	wt (Gly120, Ala121)	–	–
422	19/17/12	Omsk	7289	6	13055	0.12	0.5	0.002	8	16	0.12	Phe91, Asn95	Arg87, Glu91	Met57	ins345Asp	Pro421	wt	wt	wt	wt	wt (Gly120, Ala121)	–	–
423	19/17/08	Omsk	8616	2056	14826	32	8	0.002	2	32	0.03	Phe91, Asn95	wt (Ser87, Glu91)	Met57	wt	wt (Leu421)	wt	wt	wt	wt	wt (Gly120, Ala121)	tetM	blaTEM (African)
424	19/17/06	Omsk	7589	6	13058	1	1	0.008	16	32	1	Phe91, Asn95	Arg87, Glu91	Met57	ins345Asp	Pro421	wt	wt	wt	-35delA	wt (Gly120, Ala121)	–	–
425	19/17/07	Omsk	7589	6	13058	1	1	0.008	16	32	1	Phe91, Asn95	Arg87, Glu91	Met57	ins345Asp	Pro421	wt	wt	wt	-35delA	wt (Gly120, Ala121)	–	–
426	19/17/03	Omsk	7589	6	13058	1	1	0.015	16	32	0.5	Thr91, Gly95	Arg87, Glu91	Met57	ins345Asp	Pro421	wt	wt	wt	-35delA	wt (Gly120, Ala121)	–	–
427	19/17/18	Omsk	7289	6	13055	0.5	1	0.015	16	32	0.25	Phe91, Asn95	Arg87, Glu91	Met57	ins345Asp	Pro421	wt	wt	wt	-35delA	wt (Gly120, Ala121)	–	–
428	19/17/19	Omsk	23	27	228	0.5	0.06	0.015	0.002	32	0.03	Thr91, Gly95	wt (Ser87, Glu91)	wt (Val57)	ins345Asp	wt (Leu421)	wt	wt	wt	wt	wt (Gly120, Ala121)	–	–
429	19/17/20	Omsk	7589	6	13058	1	1	0.015	16	32	1	Phe91, Asn95	Arg87, Glu91	Met57	ins345Asp	Pro421	wt	wt	wt	-35delA	wt (Gly120, Ala121)	–	–
430	19/17/21	Omsk	7589	6	13058	1	1	0.015	16	32	1	Phe91, Asn95	Arg 87, Glu91	Met57	ins345Asp	Pro421	wt	wt	wt	-35delA	wt (Gly120, Ala121)	–	–
431	19/17/22	Omsk	9158	6	15646	1	1	0.015	16	32	0.5	Thr91, Gly95	wt (Ser87, Glu91)	Met57	ins345Asp	wt (Leu421)	wt	wt	wt	wt	Asp120, Gly121	–	–
432	19/17/23	Omsk	7289	6	13055	0.5	1	0.004	8	32	0.06	Phe91, Asn95	Arg87, Glu91	Met57	ins345Asp	Pro421	wt	wt	wt	-35delA	wt (Gly120, Ala121)	–	–
433	19/17/25	Omsk	7589	6	13058	1	1	0.004	8	32	0.25	Phe91, Asn95	Arg87, Glu91	Met57	wt	Pro421	wt	wt	wt	-35delA	wt (Gly120, Ala121)	–	–
434	19/17/28	Omsk	9411	6	16185	0.12	0.5	0.002	4	16	0.03	Thr91, Gly95	wt (Ser87, Glu91)	wt (Val57)	wt	wt (Leu421)	wt	wt	wt	wt	wt (Gly120, Ala121)	–	–
435	19/17/29	Omsk	9405	6	16183	1	1	0.002	16	16	0.5	Phe91, Asn95	Arg87, Glu91	Met57	ins345Asp	Pro421	wt	wt	wt	-35delA	wt (Gly120, Ala121)	–	–
436	19/17/17	Omsk	7289	118	12449	1	0.5	0.002	8	16	0.06	Phe91, Asn95	Arg87, Glu91	Met57	ins345Asp	Pro421	wt	wt	wt	wt	wt (Gly120, Ala121)	–	–
437	19/17/26	Omsk	7589	6	13058	2	1	0.004	8	32	0.5	Phe91, Asn95	Arg87, Glu91	Met57	ins345Asp	wt (Leu421)	wt	wt	wt	-35delA	wt (Gly120, Ala121)	–	–
438	19/16/05	Omsk	931	6	1451	1	1	0.008	4	16	0.06	Phe91, Asp95	wt (Ser87, Glu91)	Met57	ins345Asp	Pro421	wt	wt	wt	wt	Asp120, Ala121	–	–
439	19/16/04	Omsk	931	6	1451	0.06	4	0.008	32	16	0.5	Phe91, Asp95	Arg87, Glu91	Met57	ins345Asp	Pro421	wt	wt	wt	-35delA	Asp120, Ala121	–	–
440	19/16/11	Omsk	7338	674	14621	0.25	0.5	0.004	0.004	16	0.06	wt (Ser91, Asp95)	wt (Ser87, Glu91)	Met57	ins345Asp	wt (Leu421)	wt	wt	wt	wt	Asp120, Ala121	–	–
441	19/16/15	Omsk	116	2388	14619	0.5	2	0.015	32	16	0.25	Phe91, Asn95	Arg87, Glu91	Met57	ins345Asp	Pro421	wt	wt	wt	-35delA	Asn120, Asp121	–	–
442	19/16/10	Omsk	8490	6	14622	0.5	2	0.015	64	16	0.5	Phe91, Asn95	Arg87, Glu91	Met57	ins345Asp	Pro421	wt	wt	wt	-35delA	Lys120, Gly121	–	–
443	19/16/09	Omsk	3144	1218	14620	0.5	2	0.008	64	16	0.5	wt (Ser91, Asp95)	wt (Ser87, Glu91)	wt (Val57)	wt	wt (Leu421)	wt	wt	wt	wt	wt (Gly120, Ala121)	–	–
444	19/16/06	Omsk	5912	29	14617	0.12	0.5	0.004	4	16	0.25	Phe91, Asn95	Arg87, Glu91	Met57	ins345Asp	Pro421	wt	wt	wt	wt	wt (Gly120, Ala121)	–	–
445	19/16/12	Omsk	7589	6	13058	0.5	2	0.015	16	16	0.5	Phe91, Asn95	Arg87, Glu91	Met57	ins345Asp	Pro421	wt	wt	wt	-35delA	wt (Gly120, Ala121)	–	–
446	19/16/13	Omsk	7289	6	13055	0.5	1	0.015	16	16	0.5	Phe91, Asn95	Arg87, Glu91	Met57	ins345Asp	Pro421	wt	wt	wt	-35delA	wt (Gly120, Ala121)	–	–
447	19/16/14	Omsk	7289	118	12449	0.5	1	0.008	16	16	0.5	Phe91, Asn95	Arg87, Glu91	Met57	ins345Asp	Pro421	wt	wt	wt	-35delA	wt (Gly120, Ala121)	–	–
448	19/16/07	Omsk	8492	2388	14618	0.03	2	0.002	2	16	0.12	wt (Ser91, Asp95)	Arg87, Glu91	Met57	ins345Asp	wt (Leu421)	wt	wt	wt	wt	wt (Gly120, Ala121)	–	–
449	19/16/08	Omsk	7589	6	13058	0.5	2	0.008	16	16	0.5	Phe91, Asn95	Arg87, Glu91	Met57	ins345Asp	Pro421	wt	wt	wt	-35delA	wt (Gly120, Ala121)	–	–
450	19/16/18	Omsk	3621	4	14013	0.5	1	0.004	16	32	0.25	Phe91, Asn95	Arg87, Glu91	Met57	ins345Asp	Pro421	wt	wt	wt	-35delA	Asn120, Asp121	–	–
451	19/16/17	Omsk	8476	156	14623	0.015	0.06	0.002	0.002	8	0.015	wt (Ser91, Asp95)	wt (Ser87, Glu91)	wt (Val57)	ins345Asp	wt (Leu421)	wt	wt	wt	-35delA	Asn120, Ala121	–	–
452	19/16/16	Omsk	23	27	228	0.5	1	0.008	16	16	0.5	Phe91, Asn95	Arg87, Glu91	Met57	ins345Asp	Pro421	wt	wt	wt	-35delA	wt (Gly120, Ala121)	–	–
453	19/16/03	Omsk	37	27	807	0.12	0.06	0.004	0.002	32	0.12	Phe91, Asp95	wt (Ser87, Glu91)	wt (Val57)	ins345Asp	wt (Leu421)	wt	wt	wt	wt	wt (Gly120, Ala121)	–	–
454	19/16/02	Omsk	3538	187	14014	0.5	0.5	0.015	4	16	0.5	Phe91, Gly95	Arg87, Gly91	Met57	ins345Asp	Pro421	wt	wt	wt	-35delA	Asp120, Ala121	–	–
455	19/16/18	Omsk	1754	6		0.12	1	0.002	16	8	0.12	Phe91, Gly95	Arg87, Glu91	Met57	ins345Asp	Pro421	wt	wt	wt	-35delA	Asp120, Ala121	–	–
456	19/16/19	Omsk	7289	118	12449	0.5	0.25	0.002	4	32	0.12	Phe91, Gly95	Arg87, Glu91	Met57	ins345Asp	Pro421	wt	wt	wt	wt	wt (Gly120, Ala121)	–	–
457	19/16/20	Omsk	8475	4	14830	0.5	1	0.002	4	8	0.5	Phe91, Gly95	Arg87, Glu91	Met57	ins345Asp	Pro421	wt	wt	wt	-35delA	Asp120, Ala121	–	–
458	19/15/06	Omsk	7290	2098	12451	1	2	0.008	16	32	0.03	Phe91, Asp95	wt (Ser87, Glu91)	Met57	ins345Asp	Pro421	wt	wt	wt	wt	Asp120, Gly121	tetM	–
459	19/15/08	Omsk	7338	189	12559	1	2	0.008	0.008	32	0.015	wt (Ser91, Asp95)	wt (Ser87, Glu91)	Met57	ins345Asp	wt (Leu421)	wt	wt	wt	wt	Asp120, Ala121	–	–
460	19/15/01	Omsk	7289	118	12449	0.5	2	0.06	16	32	0.03	Phe91, Gly95	Arg87, Glu91	Met57	ins345Asp	Pro421	wt	wt	wt	-35delA	wt (Gly120, Ala121)	–	–
461	19/15/07	Omsk	1257	6	1993	0.015	1	0.002	0.004	32	0.002	wt (Ser91, Asp95)	wt (Ser87, Glu91)	wt (Val57)	wt	wt (Leu421)	wt	wt	wt	wt	wt (Gly120, Ala121)	–	–
462	19/15/04	Omsk	738	6	5714	0.015	0.5	0.002	0.015	32	0.004	wt (Ser91, Asp95)	Arg87, Glu91	Met57	wt	wt (Leu421)	wt	wt	wt	wt	wt (Gly120, Ala121)	–	–
463	19/15/03	Omsk	266	32	12445	0.12	0.5	0.06	0.015	32	0.004	Phe91, Gly95	Arg87, Glu91	Met57	ins345Asp	Pro421	wt	wt	wt	wt	wt (Gly120, Ala121)	–	–
464	19/15/02	Omsk	2020	6	12446	1	2	0.06	32	32	0.06	Phe91, Gly95	Arg87, Glu91	Met57	ins345Asp	Pro421	wt	wt	wt	-35delA	Lys 120, Gly121	–	–
465	19/15/11	Omsk	2020	6	12446	0.5	2	0.015	64	16	1	Phe91, Gly95	Arg87, Glu91	Met57	ins345Asp	Pro421	wt	wt	wt	-35delA	Lys 120, Gly121	–	–
466	19/15/14	Omsk	2020	6	12446	0.5	4	0.015	32	16	0.5	Phe91, Gly95	Arg87, Glu91	Met57	ins345Asp	Pro421	wt	wt	wt	-35delA	Lys 120, Gly121	–	–
467	19/15/05	Omsk	931	2097	12450	1	2	0.015	16	32	0.03	Phe91, Gly95	wt (Ser87, Glu91)	Met57	ins345Asp	Pro421	wt	wt	wt	wt	Asp120, Ala121	–	–
468	19/15/12	Omsk	7289	6	13055	0.5	0.03	0.008	8	16	0.25	Phe91, Gly95	Arg87, Glu91	Met57	ins345Asp	Pro421	wt	wt	wt	-35delA	wt (Gly120, Ala121)	–	–
469	19/15/13	Omsk	7289	6	13055	0.5	2	0.008	8	16	0.25	Phe91, Gly95	Arg87, Glu91	Met57	ins345Asp	Pro421	wt	wt	wt	-35delA	wt (Gly120, Ala121)	–	–
470	19/15/10	Omsk	7589	6	13058	0.5	2	0.008	8	8	0.25	Phe91, Gly95	Arg87, Glu91	Met57	ins345Asp	Pro421	wt	wt	wt	-35delA	wt (Gly120, Ala121)	–	–
471	19/15/15	Omsk	738	2258	13061	0.015	0.25	0.002	0.008	16	0.25	Phe91, Gly95	Arg87, Glu91	Met57	ins345Asp	Pro421	wt	wt	wt	-35delA	wt (Gly120, Ala121)	–	–
472	19/15/09	Omsk	1417	187	2875	1	2	0.03	64	32	0.06	Phe91, Gly95	Arg87, Glu91	Met57	ins345Asp	Pro421	wt	wt	wt	-35delA	Asp120, Ala121	–	–
473	19/15/16	Omsk	1754	4	9834	0.5	1	0.008	16	16	0.5	wt (Ser91, Asp95)	wt (Ser87, Glu91)	wt (Val57)	ins345Asp	wt (Leu421)	wt	wt	wt	wt	Asp120, Ala121	–	–
474	28/16/01	Penza	1257	6	1993	0.015	0.25	0.002	0.008	32	0.12	wt (Ser91, Asp95)	wt (Ser87, Glu91)	wt (Val57)	wt	wt (Leu421)	wt	wt	wt	wt	wt (Gly120, Ala121)	–	–
475	28/16/02	Penza	1257	6	1993	0.015	0.25	0.002	0.008	32	0.12	wt (Ser91, Asp95)	wt (Ser87, Glu91)	wt (Val57)	wt	wt (Leu421)	wt	wt	wt	wt	wt (Gly120, Ala121)	–	–
476	28/16/03	Penza	1257	6	1993	0.015	0.12	0.002	0.008	32	0.12	wt (Ser91, Asp95)	wt (Ser87, Glu91)	wt (Val57)	wt	wt (Leu421)	wt	wt	wt	wt	wt (Gly120, Ala121)	–	–
477	28/15/02	Penza	5675	27	9570	0.06	0.12	0.008	0.004	32	0.015	wt (Ser91, Asp95)	wt (Ser87, Glu91)	wt (Val57)	ins345Asp	wt (Leu421)	wt	wt	wt	wt	wt (Gly120, Ala121)	–	–
478	28/15/03	Penza	5675	27	9570	0.015	0.5	0.004	0.004	16	0.015	wt (Ser91, Asp95)	wt (Ser87, Glu91)	wt (Val57)	ins345Asp	wt (Leu421)	wt	wt	wt	wt	wt (Gly120, Ala121)	–	–
479	28/15/04	Penza	5675	27	9570	0.015	0.06	0.004	0.004	32	0.015	wt (Ser91, Asp95)	wt (Ser87, Glu91)	wt (Val57)	ins345Asp	wt (Leu421)	wt	wt	wt	wt	wt (Gly120, Ala121)	–	–
480	28/15/05	Penza	5675	27	9570	0.015	0.12	0.004	0.002	32	0.008	wt (Ser91, Asp95)	wt (Ser87, Glu91)	wt (Val57)	ins345Asp	wt (Leu421)	wt	wt	wt	wt	wt (Gly120, Ala121)	–	–
481	28/15/01	Penza	5675	27	9570	0.015	0.06	0.008	0.5	32	0.03	wt (Ser91, Asp95)	wt (Ser87, Glu91)	wt (Val57)	ins345Asp	wt (Leu421)	wt	wt	wt	wt	wt (Gly120, Ala121)	–	–
482	11/16/02	Pskov	5629	189	9491	0.03	0.5	0.002	0.004	16	0.12	wt (Ser91, Asp95)	wt (Ser87, Glu91)	Met57	ins345Asp	Pro421	wt	wt	wt	-35delA	wt (Gly120, Ala121)	–	–
483	11/16/03	Pskov	266	118	387	0.015	0.12	0.002	0.004	16	0.06	wt (Ser91, Asp95)	wt (Ser87, Glu91)	wt (Val57)	wt	wt (Leu421)	wt	wt	wt	wt	wt (Gly120, Ala121)	–	–
484	11/16/04	Pskov	8610	118	14831	0.015	0.12	0.002	0.002	16	0.12	wt (Ser91, Asp95)	wt (Ser87, Glu91)	wt (Val57)	wt	wt (Leu421)	wt	wt	wt	wt	Asp120, Ala121	–	–
485	11/16/01	Pskov	738	118	1152	0.015	0.12	0.002	0.008	16	0.12	wt (Ser91, Asp95)	wt (Ser87, Glu91)	wt (Val57)	wt	wt (Leu421)	wt	wt	wt	wt	wt (Gly120, Ala121)	–	–
486	11/16/05	Pskov	8609	1195	14832	0.015	0.12	0.002	0.002	16	0.12	wt (Ser91, Asp95)	wt (Ser87, Glu91)	wt (Val57)	wt	wt (Leu421)	wt	wt	wt	wt	wt (Gly120, Ala121)	–	–
487	13/17/01	Ryazan	9336	4	16182	1	1	0.004	32	16	0.25	Phe91, Asn95	Arg87, Glu91	Met57	ins345Asp	Pro421	wt	wt	wt	-35delA	Lys 120, Asn 121	–	–
488	13/16/01	Ryazan	1935	4	4707	2	2	0.015	32	32	0.25	Phe91, Asn95	Arg87, Glu91	Met57	ins345Asp	Pro421	wt	wt	wt	-35delA	Asn120, Asp121	–	–
489	13/16/05	Ryazan	8085	2285	14022	0.12	0.03	0.002	0.002	32	0.06	wt (Ser91, Asp95)	wt (Ser87, Glu91)	Met57	ins345Asp	wt (Leu421)	wt	wt	wt	wt	wt (Gly120, Ala121)	–	–
490	13/16/04	Ryazan	1935	4	4707	2	4	0.015	32	32	0.5	wt (Ser91, Asp95)	Arg87, Glu91	Met57	ins345Asp	Pro421	wt	wt	wt	wt	Asn120, Asp121	–	–
491	13/16/06	Ryazan	1935	4	4707	2	2	0.03	32	16	1	Phe91, Asn95	Arg87, Glu91	Met57	ins345Asp	Pro421	wt	wt	wt	-35delA	Asn120, Asp121	–	–
492	13/16/03	Ryazan	7730	2285	13315	0.12	0.5	0.002	0.008	32	0.12	wt (Ser91, Asp95)	Arg87, Glu91	Met57	ins345Asp	wt (Leu421)	wt	wt	wt	-35delA	wt (Gly120, Ala121)	–	–
493	13/16/02	Ryazan	91	4	972	2	4	0.015	64	16	0.25	Phe91, Asn95	wt (Ser87, Glu91)	wt (Val57)	ins345Asp	Pro421	wt	wt	wt	wt	Asn120, Asp121	–	–
494	13/16/13	Ryazan	7754	291	13367	0.06	0.5	0.002	0.12	16	0.06	wt (Ser91, Asp95)	wt (Ser87, Glu91)	wt (Val57)	ins345Asp	wt (Leu421)	wt	wt	wt	wt	wt (Gly120, Ala121)	–	–
495	13/16/10	Ryazan	931	137	13363	16	32	0.008	4	16	0.06	wt (Ser91, Asp95)	wt (Ser87, Glu91)	Met57	ins345Asp	Pro421	wt	wt	wt	wt	Asp120, Ala121	tetM	blaTEM (African)
496	13/16/11	Ryazan	91	4	972	0.5	4	0.008	64	16	0.5	Phe91, Asn95	wt (Ser87, Glu91)	Met57	ins345Asp	Pro421	wt	wt	wt	wt	Asn120, Asp121	–	–
497	13/16/12	Ryazan	91	4	972	0.5	2	0.015	32	16	0.5	Phe91, Asn95	wt (Ser87, Glu91)	wt (Val57)	ins345Asp	Pro421	wt	wt	wt	wt	Asn120, Asp121	–	–
498	13/16/08	Ryazan	7730	2285	13315	0.12	0.5	0.002	0.008	16	0.06	wt (Ser91, Asp95)	wt (Ser87, Glu91)	Met57	ins345Asp	wt (Leu421)	wt	wt	wt	wt	wt (Gly120, Ala121)	–	–
499	13/16/09	Ryazan	1935	4	4707	0.5	2	0.015	64	16	0.25	Phe91, Asn95	Arg87, Glu91	Met57	ins345Asp	Pro421	wt	wt	wt	-35delA	Asn120, Asp121	–	–
500	13/16/07	Ryazan	8081	137	14015	16	32	0.015	16	16	0.06	Phe91, Ala 95	Asn 87, Lys91	wt (Val57)	ins345Asp	Pro421	wt	wt	wt	wt	Asp120, Ala121	tetM	blaTEM (African)
510	02/16/02	Stavropol	738	72	13366	0.03	0.25	0.002	2	16	0.03	Phe91, Asn95	Ser87, Gly91	Met57	ins345Asp	Pro421	wt	wt	wt	-35delA	wt (Gly120, Ala121)	–	–
502	02/16/03	Stavropol	738	72	13366	0.25	0.25	0.002	1	16	0.06	Phe91, Asn95	Ser87, Gly91	Met57	ins345Asp	Pro421	wt	wt	wt	-35delA	wt (Gly120, Ala121)	–	–
503	02/16/04	Stavropol	738	72	13366	0.03	0.12	0.002	2	16	0.015	Phe91, Asn95	Ser87, Gly91	Met57	ins345Asp	Pro421	wt	wt	wt	-35delA	wt (Gly120, Ala121)	–	–
504	41/16/08	Tomsk	738	6	5714	0.5	1	0.03	16	32	0.25	Phe91, Asn95	Arg87, Glu91	Met57	ins345Asp	Pro421	wt	wt	wt	-35delA	wt (Gly120, Ala121)	–	–
505	41/16/09	Tomsk	37	27	807	0.06	0.12	0.002	0.004	16	0.06	wt (Ser91, Asp95)	wt (Ser87, Glu91)	wt (Val57)	ins345Asp	wt (Leu421)	wt	wt	wt	wt	wt (Gly120, Ala121)	–	–
506	41/16/10	Tomsk	37	2450	14624	0.06	0.25	0.008	0.008	16	0.06	wt (Ser91, Asp95)	Ser87, Gly 91	wt (Val57)	wt	wt (Leu421)	wt	wt	wt	wt	wt (Gly120, Ala121)	–	–
507	41/16/11	Tomsk	37	27	807	0.06	0.25	0.004	0.008	32	0.12	wt (Ser91, Asp95)	wt (Ser87, Glu91)	wt (Val57)	ins345Asp	wt (Leu421)	wt	wt	wt	wt	wt (Gly120, Ala121)	–	–
508	41/16/12	Tomsk	37	27	807	0.03	0.5	0.004	0.008	32	0.12	wt (Ser91, Asp95)	wt (Ser87, Glu91)	wt (Val57)	ins345Asp	wt (Leu421)	wt	wt	wt	wt	wt (Gly120, Ala121)	–	–
509	41/16/07	Tomsk	738	6	5714	0.015	0.12	0.002	0.008	16	0.12	wt (Ser91, Asp95)	wt (Ser87, Glu91)	wt (Val57)	wt	wt (Leu421)	wt	wt	wt	wt	wt (Gly120, Ala121)	–	–
510	41/16/05	Tomsk	738	r		0.015	0.12	0.002	0.008	16	0.06	wt (Ser91, Asp95)	wt (Ser87, Glu91)	wt (Val57)	wt	wt (Leu421)	wt	wt	wt	wt	wt (Gly120, Ala121)	–	–
511	41/16/06	Tomsk	738	6	5714	0.015	0.06	0.002	0.008	16	0.12	wt (Ser91, Asp95)	wt (Ser87, Glu91)	wt (Val57)	wt	wt (Leu421)	wt	wt	wt	wt	wt (Gly120, Ala121)	–	–
512	41/16/02	Tomsk	738	6	5714	0.03	0.25	0.002	0.008	32	0.25	wt (Ser91, Asp95)	wt (Ser87, Glu91)	wt (Val57)	wt	wt (Leu421)	wt	wt	wt	wt	wt (Gly120, Ala121)	–	–
513	41/16/01	Tomsk	738	6	5714	0.015	0.06	0.002	0.002	8	0.03	wt (Ser91, Asp95)	Arg87, Glu91	wt (Val57)	wt	wt (Leu421)	wt	wt	wt	wt	wt (Gly120, Ala121)	–	–
514	41/16/04	Tomsk	738	6	5714	0.015	0.12	0.002	0.008	16	0.12	wt (Ser91, Asp95)	wt (Ser87, Glu91)	wt (Val57)	wt	wt (Leu421)	wt	wt	wt	wt	wt (Gly120, Ala121)	–	–
515	41/16/03	Tomsk	738	6	5714	0.015	0.25	0.002	0.008	8	0.12	wt (Ser91, Asp95)	wt (Ser87, Glu91)	wt (Val57)	wt	wt (Leu421)	wt	wt	wt	wt	wt (Gly120, Ala121)	–	–
516	41/16/13	Tomsk	738	6	5714	0.015	0.25	0.002	0.008	16	0.12	wt (Ser91, Asp95)	wt (Ser87, Glu91)	wt (Val57)	wt	wt (Leu421)	wt	wt	wt	wt	wt (Gly120, Ala121)	–	–
517	41/15/01	Tomsk	738	6	5714	0.015	0.25	0.002	0.008	32	0.03	wt (Ser91, Asp95)	wt (Ser87, Glu91)	wt (Val57)	wt	wt (Leu421)	wt	wt	wt	wt	wt (Gly120, Ala121)	–	–
518	41/15/02	Tomsk	738	6	5714	0.015	0.5	0.002	0.002	32	0.03	wt (Ser91, Asp95)	wt (Ser87, Glu91)	wt (Val57)	ins345Asp	wt (Leu421)	wt	wt	wt	wt	wt (Gly120, Ala121)	–	–
519	41/15/04	Tomsk	738	6	5714	0.015	0.25	0.002	0.002	32	0.03	wt (Ser91, Asp95)	wt (Ser87, Glu91)	wt (Val57)	wt	wt (Leu421)	wt	wt	wt	wt	wt (Gly120, Ala121)	–	–
520	41/15/05	Tomsk	738	6	5714	0.015	0.12	0.002	0.002	32	0.03	wt (Ser91, Asp95)	wt (Ser87, Glu91)	wt (Val57)	wt	wt (Leu421)	wt	wt	wt	wt	wt (Gly120, Ala121)	–	–
521	41/15/03	Tomsk	971	6	12556	2	4	0.03	8	32	0.06	Phe91, Gly95	Arg87, Glu91	Met57	ins345Asp	Pro421	wt	wt	wt	-35delA	Lys 120, Asn 121	–	–
522	40/16/01	Tyva	908	32	6903	0.25	1	0.004	16	32	0.12	Phe91, Asn95	Arg87, Glu91	wt (Val57)	ins345Asp	wt (Leu421)	wt	wt	wt	wt	Lys120, Asn121	–	–
ST – NG-MAST sequence type, Pen – penicillin, Tet – tetracycline, Cef – ceftriaxone, Cip – ciprofloxacin, Spec – spectinomycin, Azit – azithromycin.
